# Supplementary material for: The charcoal morphology of different vegetation types in the wildfire
Source: Copernicus journal article supplement (doi:10.5194/egusphere-2025-3665), 2025-08-12
Supplement: Supplementary file 1 [file egusphere-2025-3665-supplement.zip]

## Sheet: Area
Pinus yunnanensis	Cryptomeria japonica	Pinus massoniana	Pinus densata	Quercus glauca	Stipa capillata	Miscanthus sinensis	Neyraudia reynaudiana	Arundinella setosa	Cyperus cuspidatus
Evergreen coniferous forests				Evergreen broad-leaf forests	Grasslands	Herbs
7.22087	3.91743	7.78608	18.9251	7.0182	4.47213	3.36724	27.1541	19.3477	52.2635
5.81272	77.4164	4.04654	5.92757	10.2105	8.95703	3.23738	2.92062	5.71514	29.1972
6.85307	7.35523	3.33346	140.117	14.6857	5.88929	4.41284	8.23494	39.1571	12.8579
6.93639	31.3275	2.39745	36.1877	3.1368	2.00713	3.08801	20.8407	10.3134	11.5827
42.0424	34.5979	17.508	22.0064	6.75174	9.60631	4.43535	32.4046	7.26065	4.93601
9.44042	35.0798	2.54832	21.2287	9.01933	3.35297	5.59805	6.81404	7.28692	7.31019
6.72396	8.53518	59.6622	7.29743	35.0745	5.62132	3.78608	11.4415	17.0921	14.8426
4.72284	29.9456	19.4813	3.28767	14.1437	1.79771	8.31601	12.3595	4.70407	12.343
3.86789	5.9636	15.5376	8.74986	8.5577	1.19572	23.5864	0.435354	7.16607	8.78439
4.69281	27.8311	3.33196	136.552	3.78382	1.20623	9.56802	15.3485	18.9139	9.15219
12.7791	62.0897	5.53199	15.3575	31.2494	1.92982	8.34153	1.60631	7.66373	25.1334
7.05273	154.051	7.12554	10.8381	49.7902	3.50009	6.85832	13.3211	61.7444	13.1394
8.59448	45.8795	7.04748	26.0597	21.8322	8.48039	5.62582	10.3134	41.6483	14.6279
106.996	78.2563	10.7007	2.43423	24.5592	4.82792	6.91762	4.08632	7.5091	39.8739
4.06831	33.6198	84.3295	10.0041	30.5588	5.59655	17.9839	14.7637	19.0265	8.05029
4.74385	16.5464	19.4948	15.3305	10.0342	3.55789	3.52486	3.45881	9.09364	9.37061
19.1113	5.49897	13.8968	5.09139	68.4504	2.23006	10.2135	7.19159	5.53124	27.696
31.0813	23.7088	128.871	9.88778	10.2796	2.19553	3.98199	10.5468	5.89604	3.49409
13.0554	16.1644	5.85776	11.6262	7.62244	5.95534	16.3513	1.03809	4.40458	9.26102
38.7525	9.67686	60.0616	34.146	13.3038	1.42916	5.12291	3.4483	31.3004	4.5532
28.3115	15.3162	44.4819	4.3648	8.00826	1.81573	7.81685	13.3211	20.5142	18.9597
84.4954	286.886	8.83543	33.2565	9.17771	2.95965	3.8799	14.1663	8.54419	21.9734
13.8578	10.2518	4.97804	7.09176	13.7932	2.22481	8.42635	5.73391	131.56	138.78
28.5374	26.5836	15.3777	14.3974	32.4346	1.48396	26.1933	4.23944	25.4172	3.92269
16.8512	3.56014	22.5416	9.40589	5.93057	4.927	5.23851	5.57703	15.7628	8.03603
12.1374	166.027	13.4232	6.28636	30.9049	4.19441	2.59636	50.6159	6.89735	8.25296
6.5791	78.6639	46.5258	51.8326	5.11015	1.46819	2.41171	7.22012	6.49953	3.54963
13.6438	14.2698	13.6311	5.43066	7.47457	8.22593	25.4307	7.38525	9.80972	13.1845
25.8202	78.8838	12.1359	10.6406	10.1415	4.003	6.19328	4.84894	18.2706	4.0653
4.8632	18.9972	15.3162	69.6348	53.1942	7.28692	4.96078	14.0814	13.7782	30.9642
9.34584	13.2272	7.5121	20.4586	3.84913	7.76581	6.63464	5.41565	20.978	25.0854
2.44474	10.4567	7.9437	8.62601	2.50253	5.2903	7.36799	6.56859	17.7579	17.6326
7.38975	2.80278	160.129	56.1471	7.97523	9.54926	8.87221	3.0122	12.1554	158.172
10.7938	2.48827	29.0163	26.0935	7.64496	5.0441	18.3216	16.9172	18.6271	8.90824
28.6485	112.016	26.5438	7.80709	9.17996	2.44849	6.29461	5.07713	6.8298	5.45768
15.723	8.48264	14.7833	18.7157	13.27	5.87202	4.93226	4.65153	7.43479	19.7043
101.109	28.5172	11.3124	36.7251	10.7435	3.02496	7.13229	24.6988	28.8399	6.86733
4.44736	18.2563	3.76431	24.6418	9.24001	4.30024	7.30193	8.57497	6.35541	7.12104
11.8108	9.30156	25.5035	22.2473	13.4096	1.95309	3.997	4.1824	9.18371	89.4907
11.7846	4.48414	85.577	9.5335	141.676	3.17583	5.63858	9.04035	6.41922	13.8112
3.20285	40.4113	5.24826	6.0289	82.3644	19.6525	3.19835	17.568	3.86864	11.6705
12.0098	49.4164	23.389	23.2059	8.20116	2.66316	2.50854	22.7953	5.83899	6.26159
3.28992	17.3151	8.79264	5.57178	5.99137	5.21223	6.36217	4.56746	8.4954	62.0672
4.95403	9.01182	5.71214	12.4774	4.79039	5.26102	32.8414	1.10114	9.81197	3.84387
17.3699	34.4628	11.4626	14.7945	11.8138	5.71815	6.5896	21.2265	22.9702	25.7624
40.0676	215.655	22.4477	13.8045	7.58942	3.41377	7.46482	205.532	5.30381	22.459
26.3967	4.62	16.0263	38.4898	4.36104	3.64796	9.07938	2.86358	40.7956	4.97279
59.1556	12.0983	22.9499	12.2807	8.34078	4.15012	3.47382	4.54945	10.6662	17.4419
6.10021	1.67911	7.04522	11.4243	3.04372	2.2751	8.24245	2.68944	11.991	11.6037
7.47232	12.1111	5.53725	7.35222	68.1756	1.95909	3.86189	2.71195	11.4378	45.2926
4.69281	13.6626	14.7788	34.8223	4.39182	1.8465	7.05723	6.29912	21.845	5.05085
12.2222	24.4474	11.4476	25.8157	4.46988	3.80709	7.19985	15.8799	11.6577	4.82417
72.6876	22.3134	21.9156	11.8244	5.33158	3.64121	2.66692	3.31319	21.0133	3.03772
46.0965	29.8713	14.5656	29.9358	8.33928	6.04992	9.50647	6.41171	52.1208	53.2805
18.5791	64.4406	5.95609	18.802	15.4603	7.92419	4.81591	4.5502	17.4862	74.459
36.3415	61.2798	6.31413	59.5271	13.8743	7.95646	5.06587	7.48808	8.11034	9.12892
5.77144	79.8574	20.3205	3.95722	11.2622	1.95384	4.34153	6.11297	25.8878	11.3072
6.63389	106.519	5.82323	5.60105	8.83468	6.10246	6.3952	9.90054	27.2832	5.66936
20.265	113.151	9.02308	8.16588	7.87014	6.47401	16.2515	7.31244	23.2989	6.17302
4.08932	11.9617	13.8247	7.99099	20.4444	5.71589	4.10058	4.29349	7.49334	6.82079
20.7859	57.8923	80.3175	4.8647	10.6016	7.42203	5.64384	1.37587	12.0308	6.73147
24.7994	15.2441	5.78195	12.5449	4.43385	7.57515	4.27773	4.84969	23.3777	10.5866
5.50422	5.60255	233.491	18.0589	11.2479	3.4438	11.714	0.999812	11.4896	50.9079
12.5014	21.6731	7.17658	31.696	26.5093	3.31845	8.21693	7.56465	16.4444	64.3085
4.32126	35.6074	101.78	7.7553	94.9867	2.25633	6.01013	11.7073	6.95965	5.22124
5.10715	34.0387	16.0946	4.99381	27.5211	2.12272	3.25089	4.76637	5.29931	9.45693
4.66879	26.2999	18.17	2.8253	3.18559	3.49709	2.53406	3.04147	5.26253	20.9555
11.1556	33.863	13.9103	2.67743	4.11034	1.7279	3.19384	4.87671	7.60893	7.94821
4.82717	17.3301	36.7791	32.7529	10.8283	1.38563	2.43573	6.44173	70.2436	31.1068
62.429	31.9625	7.91068	8.13811	22.6864	3.62545	6.25783	5.84275	22.1475	53.809
13.7474	13.4494	16.0893	7.87465	6.02214	1.82774	13.1582	12.0638	6.8936	20.6605
4.60424	44.322	7.52787	4.72659	9.30531	3.17958	11.4258	1.54776	5.45919	8.17865
3.21786	6.14149	11.8409	10.8936	9.19722	1.81422	3.7493	4.62901	18.194	20.8474
5.60706	29.3594	12.349	10.5228	2.43648	5.56953	3.32445	2.45074	6.35842	2.72847
8.89473	29.9013	33.2971	10.4883	5.32858	4.1869	5.2295	4.75136	27.5729	9.60555
104.09	61.9996	31.064	16.1021	15.0535	2.94239	34.6827	2.49953	5.20548	6.0364
15.675	15.5196	28.7461	8.84894	11.8544	4.22443	5.13567	15.3192	10.8088	28.6132
13.3346	11.1315	7.78608	18.7217	5.9103	3.22162	3.2051	4.47739	9.20248	7.90767
48.2139	66.2173	12.1434	9.15519	4.48564	1.02608	12.6485	9.08463	9.98987	3.04522
16.891	14.197	10.9191	9.09139	11.3177	4.21017	9.13717	2.27585	10.6459	9.541
6.06117	29.261	32.9623	15.1511	33.4659	3.16307	3.47232	3.12104	30.2338	7.2614
15.4408	2.94089	28.4226	79.5016	12.2162	4.33853	14.5956	9.09139	14.188	5.5425
33.3113	14.197	14.9161	7.36273	26.2406	2.08594	21.5575	5.18596	8.86545	24.2747
26.8778	9.33909	6.29762	7.31019	51.7958	2.5273	6.51379	3.03622	19.1968	14.4853
19.5631	17.2212	7.32895	12.8917	12.5134	1.01558	6.19929	4.35354	16.4399	5.2888
47.5819	173.543	7.88591	190.849	31.4355	5.79921	13.7609	11.4325	10.9319	5.85476
27.3732	23.4063	48.632	18.3457	18.8523	6.31038	12.4909	4.14337	7.41077	3.09552
120.436	10.9927	23.2389	7.2644	2.42522	5.26553	5.36086	3.98874	27.8709	19.0407
18.2135	75.1466	16.554	14.2946	14.9852	7.55864	2.8283	2.77651	10.2308	9.92006
6.8328	117.427	174.182	17.2941	18.5971	4.78138	3.46181	13.2693	5.80146	5.6003
5.8495	8.1291	19.9715	29.0606	47.5804	3.38225	5.73541	8.14862	17.4021	9.66335
3.28917	80.0736	4.07656	13.6086	9.7872	2.44924	10.8696	4.20642	4.51342	29.5275
11.7846	15.4888	16.8572	6.05517	35.0265	3.72678	15.4303	6.20529	9.2918	16.7258
4.64628	23.0482	5.31807	12.0713	12.7874	3.12779	21.1334	10.3532	4.11484	11.6052
19.4273	16.7596	14.6391	47.41	3.55189	5.88028	2.75849	13.7309	12.8444	9.8495
19.8071	38.5994	14.4027	14.5228	5.225	2.30587	18.8313	14.2083	64.8917	20.5397
11.7155	3.30343	6.7097	4.52167	9.17546	2.48227	13.6866	8.90749	5.80146	10.405
11.5932	24.7348	8.16063	2.47701	5.01407	4.48039	8.07206	25.1612	7.29443	9.11541
13.0253	20.6838	110.876	5.19197	81.6911	11.4753	7.49334	17.3939	7.43179	4.87521
10.8313	45.2242	50.5453	15.2411	25.0306	1.5943	9.71289	33.3421	3.43404	15.681
23.5992	8.37455	135.58	30.2548	12.8579	5.7902	6.25483	14.8718	4.7431	6.66842
9.13567	8.6733	30.5723	2.64215	30.5378	6.90861	8.66504	3.52186	16.25	14.5356
7.70201	19.1383	22.9439	33.7609	12.9368	4.38957	9.31957	7.39426	31.6089	6.71045
23.4761	38.4778	26.7607	8.81291	11.5902	2.17977	10.6024	6.66091	16.8572	3.2021
15.0437	31.0212	10.0161	10.1663	9.53425	4.89097	3.22237	11.4828	4.16814	30.4718
12.7439	34.1505	7.16382	17.2055	21.4412	11.0077	29.1447	21.3031	28.4744	13.6393
4.7326	34.8245	16.6725	16.936	12.969	14.4357	5.03134	31.1038	6.28711	3.39801
6.24057	8.43836	6.60236	19.8138	20.7011	25.3293	7.38225	5.18521	8.70407	3.6352
54.9574	29.3991	4.64928	3.84913	7.47758	7.49109	7.95271	9.17771	37.2393	4.10884
24.8227	27.4528	55.5421	3.53162	22.5333	9.3556	3.65322	37.4795	107.978	4.68155
12.6283	61.7887	61.0539	4.65603	32.659	8.4894	43.6502	8.36855	21.6754	4.90148
12.1674	45.4682	25.502	11.1526	73.7136	12.0203	42.3554	6.04316	64.7619	3.27641
13.258	152.302	16.1862	10.5138	19.4468	2.07919	4.23344	12.0578	23.3807	9.11165
9.81723	77.0584	15.5526	23.6315	57.2453	5.70464	64.7251	42.6549	20.6245	6.84256
22.2781	33.4187	39.1736	5.74742	7.55189	2.54907	6.85307	27.3019	29.9426	11.0617
52.4751	9.53575	30.742	8.06155	18.6692	3.59542	4.1809	8.64177	9.36911	31.1616
13.9719	56.018	32.0856	5.52974	24.3333	3.90167	15.8048	75.4468	17.3263	15.8093
10.6729	87.1886	44.8084	25.1109	14.45	12.0203	7.54363	28.1854	10.7277	10.137
21.0539	35.6622	22.0769	14.7157	24.1644	16.5007	8.28148	13.0921	12.6598	22.4943
56.6193	10.3029	52.7604	22.8831	9.7872	2.25183	6.4635	13.0261	100.083	12.9488
96.5825	8.32276	58.2481	5.02608	7.42653	4.48114	6.91987	7.86714	103.509	4.99005
31.0587	111.369	21.2152	22.2376	7.65697	7.16757	4.88197	11.8221	10.8959	12.6876
7.78157	7.59167	4.95628	11.3335	3.00844	4.44361	3.99925	9.42166	20.7604	114.098
10.8944	23.2336	35.7936	40.6966	3.92419	12.6876	17.9583	17.8345	192.095	14.188
13.7549	189.854	13.9088	72.2252	11.2516	4.80766	13.5973	19.9557	5.52974	11.642
11.3049	32.9698	19.7433	30.6024	5.73916	2.75774	11.5046	154.702	31.9204	8.11184
45.0996	8.65453	27.5571	7.50009	12.9585	2.81929	7.2021	25.6649	15.7403	14.2894
302.734	16.3761	12.6778	8.18015	8.7371	3.31169	11.4025	11.7793	22.5213	22.2
12.4691	10.1535	12.361	64.4856	126.196	2.43798	10.9844	8.07806	34.9454	5.50798
38.6774	14.8778	13.4262	2.31788	9.19497	3.94671	8.94502	26.3479	8.82117	8.50366
11.5691	53.4562	11.6352	7.41603	23.019	3.66598	26.3051	18.0409	75.1345	21.1552
30.3614	58.7773	34.0056	13.5868	25.4674	3.52637	25.3166	7.85588	15.2839	20.0203
37.7422	8.38731	69.9929	32.1088	7.57365	9.66185	7.1353	23.8611	12.3933	35.136
13.3849	58.0469	3.39201	9.56727	4.10208	3.05348	12.7454	16.6628	78.8944	10.3126
22.7127	9.08238	20.2177	4.77538	5.85175	6.11222	23.5789	10.4305	82.4185	22.0274
20.3558	17.568	8.19816	7.34547	14.6294	1.66635	64.5247	29.2843	4.44661	8.52017
13.7639	13.6003	12.7454	5.78195	14.784	1.1687	6.36667	5.02158	7.87615	5.97861
11.7185	317.398	4.96153	19.1518	8.46613	2.69769	12.1246	6.7735	11.1511	11.654
7.8116	371.841	10.9206	18.8583	12.8227	5.72941	7.65247	5.97936	8.11559	12.4481
30.0859	11.4956	45.5215	12.9075	70.9521	2.50479	13.3564	10.0559	10.2105	5.85175
27.1803	44.5772	11.4393	7.16307	31.7921	2.72171	6.39144	15.5301	4.31901	3.25464
20.1831	58.7652	32.4286	9.84575	14.4943	3.15782	8.46613	4.7446	4.53518	8.83393
36.7356	11.1766	17.1041	3.8161	36.8835	5.2948	5.4712	9.851	26.5205	7.71627
9.89679	60.1711	11.8807	0.19666	5.86602	4.90073	2.48752	18.2391	7.53087	10.468
7.74554	27.6622	67.0963	0.141865	3.09777	5.01858	6.37568	5.61306	4.15012	6.08594
95.3898	52.1892	22.9574	1.14618	27.2749	5.36986	15.6532	8.99231	14.3111	22.5416
26.4342	9.95309	9.60931	0.162882	23.5489	3.35823	22.7547	7.16232	5.96209	30.5033
76.5952	13.6131	106.086	2.75023	5.45919	4.34303	15.079	16.5074	4.6155	2.88084
58.6587	8.04654	12.0653	0.101332	28.262	13.3518	6.2811	8.20492	13.833	9.91706
33.8022	173.829	10.0552	0.112591	15.8431	3.53462	17.174	3.95947	4.82792	34.2789
23.4228	4.79715	4.70332	13.7654	15.0617	2.69244	13.2032	11.335	5.05386	17.5207
45.833	13.7925	7.87615	0.0810659	16.3138	2.18427	4.38431	8.3663	30.6384	3.44455
25.5365	14.9672	7.2584	8.41133	8.23569	6.75023	5.82999	25.4907	15.8611	70.4162
130.279	25.1499	7.35072	9.20023	6.12723	4.22593	5.93807	24.7326	8.43235	14.5063
12.6688	6.50629	22.462	9.12516	6.0942	2.20079	17.9561	7.81835	4.70933	5.96735
40.8099	5.91481	34.3494	79.8011	5.18296	1.61606	10.0109	8.8587	5.88553	5.15068
9.58604	5.52299	22.9289	15.2021	13.3121	3.81685	10.7157	5.69037	14.51	33.7166
26.2991	230.829	5.08913	13.6176	8.01051	3.65397	5.75267	12.5479	222.991	4.71533
30.3074	15.6217	13.4141	86.1092	4.80015	3.78382	6.10546	8.93901	4.51192	37.6543
28.3468	7.90843	8.94502	7.39876	13.4764	7.31695	3.10527	23.3635	25.7842	45.1882
13.8405	24.2725	17.4524	28.349	6.40045	1.36086	4.92625	9.21524	15.1961	6.25183
56.7844	19.7756	16.7634	29.8878	10.2451	1.33984	4.85419	15.106	23.4911	38.6181
19.1173	47.8529	26.8185	12.9375	8.44286	2.12648	22.1723	6.46575	28.4316	13.4855
47.943	7.1413	6.84556	7.33871	18.3149	4.53744	7.29743	19.1068	51.0265	3.91443
28.7679	9.83299	6.32089	6.78551	8.8009	1.81122	6.63239	33.9156	20.4849	7.17733
498.679	5.74141	28.7574	191.089	4.65753	1.49371	8.32501	8.80916	50.4087	17.1379
15.5894	10.5386	60.5382	18.4065	8.09308	2.28035	3.65022	16.6981	14.1768	2.42222
15.8364	150.343	10.5806	7.29893	3.83637	1.64459	2.66992	26.2578	17.3661	10.3111
7.11653	61.7039	50.4215	14.3562	78.2616	1.87953	5.99962	13.7542	4.55845	4.88572
23.8957	70.82	23.2164	13.6581	26.4733	5.22274	12.1674	15.4858	17.6874	10.0266
33.6829	4.8572	52.8715	12.1254	7.80634	5.64384	2.77125	27.3725	10.0274	6.20754
34.7367	12.1899	37.8187	17.3706	4.3115	1.76243	3.18859	15.3807	261.684	43.5992
11.4851	75.4701	110.903	29.1199	10.0334	8.41584	6.1505	26.3689	45.9035	13.9073
33.5027	6.33965	7.93845	47.5481	7.69075	2.68118	5.64759	11.8319	8.1186	31.4108
8.35954	12.3678	36.8489	14.5843	4.80691	9.95309	7.54888	10.9356	18.3156	7.70501
23.4708	75.1646	11.2561	31.8822	6.59336	3.44305	8.54795	6.42822	35.8439	7.71026
9.98161	38.8733	33.0831	7.25314	5.231	6.26909	13.7497	16.3273	7.71552	9.30381
35.4153	21.4922	20.9127	30.6376	11.4295	3.24639	4.76412	13.9809	23.061	4.76112
17.3714	526.263	10.0507	10.8245	35.744	6.15725	8.72359	44.271	11.4123	7.12254
49.55	34.0912	14.7893	78.155	17.6191	3.94896	5.53049	32.8527	5.87803	7.2674
18.3029	8.91124	18.4522	26.5611	7.37624	3.14506	6.01689	10.9259	13.887	20.8677
55.3192	10.7645	6.96791	52.8414	9.29856	7.23213	19.1773	6.34941	27.7253	21.5538
58.5288	8.67029	5.47645	57.231	6.20229	2.90636	10.2083	8.6185	5.17395	78.6009
8.77763	415.942	4.86545	36.1982	16.4001	5.94333	3.65922	9.11015	13.5087	2.82304
37.5252	458.376	6.42147	21.8015	4.08782	7.71777	8.39107	6.41171	2.51905	42.8133
19.413	39.6412	11.8349	8.87446	4.33853	1.61231	3.91818	13.905	64.566	24.2972
72.7371	633.546	8.26421	16.5247	30.7427	1.98611	6.75774	7.04748	3.47007	10.522
40.6755	15.9257	11.3282	17.8082	7.97523	2.36067	5.21223	4.62826	11.2344	52.0548
22.1835	6.40345	11.329	7.31619	34.7547	3.53012	9.34284	11.073	135.228	14.6797
10.0236	22.3892	108.487	37.4006	7.82961	12.7994	5.90129	9.43892	96.8422	32.3055
10.9206	55.362	32.9638	19.38	68.7108	4.94577	4.17489	39.2254	15.5016	8.28073
10.4815	92.5975	17.4832	10.3201	3.04673	3.10452	14.8456	24.8835	8.84819	4.07281
22.4875	57.4577	24.5202	12.3318	7.30869	4.41133	4.32201	11.8251	5.63633	22.8801
14.5641	121.847	15.3139	7.96022	27.4138	3.18484	3.37474	11.6592	22.6301	4.93076
116.417	28.4714	53.3391	7.51811	37.2648	3.53837	6.67667	12.2222	6.79002	21.0944
97.3511	11.2884	12.2102	15.0009	7.42353	2.1535	15.9587	8.93151	15.2224	6.26234
7.80334	8.1884	19.073	9.37211	13.243	0.0540439	6.41171	48.1163	24.6373	9.25202
45.8262	62.9401	17.3564	8.89172	3.99249	0.133609	9.33834	9.04635	12.867	49.6296
37.571	161.359	9.6656	9.48771	10.0109	0.0945768	37.1454	20.4646	15.2224	30.1175
15.0497	10.7758	17.7819	31.0722	12.0398	0.120848	7.96547	18.4688	5.09439	43.0167
7.52036	29.1492	9.21599	19.115	7.76356	0.156127	23.9595	9.535	33.4247	21.3008
13.7669	25.3316	120.616	25.6664	10.9822	0.11034	11.2674	11.6232	17.4562	12.2349
45.788	8.54719	47.2404	24.2139	13.0178	0.301745	8.21317	28.2184	43.4228	21.3008
13.7609	6.6429	59.082	8.50366	8.29949	0.222181	9.38112	5.01407	18.447	17.171
7.4513	23.4746	21.0569	9.09589	11.0144	0.768625	17.1822	23.7808	23.4213	7.54363
22.5768	8.6155	12.4421	6.88985	9.93657	1.36086	5.60781	7.67048	9.44042	5.4164
9.85251	24.2334	33.8382	6.4665	7.23062	0.174892	8.62301	27.6367	3.04222	7.4513
31.5384	30.0582	11.0512	10.6309	9.32558	0.0555451	7.13079	4.7979	37.9381	17.4111
18.6947	23.9287	107.18	6.34491	6.43948	0.372302	9.11691	9.38262	6.41171	7.09777
18.2488	22.095	18.8013	9.56352	6.40796	5.58754	8.4924	15.7523	7.10227	42.4635
37.0291	7.6337	22.5506	6.32014	10.0567	0.176393	4.46238	17.6536	2.26309	14.8125
30.405	67.5451	10.2931	6.72096	4.96153	0.641021	8.96829	19.2464	5.75342	13.9561
26.0754	6.93789	33.2355	22.1422	11.4528	0.469131	6.50854	13.9989	9.89454	13.1327
10.0619	5.40514	43.8994	6.28786	3.10677	4.81967	19.639	16.5442	5.37962	12.8782
10.9514	184.91	16.0135	19.1683	3.59767	0.0803153	3.63145	76.2087	26.4838	76.0278
6.87183	16.0608	27.2989	17.1244	9.14018	0.165885	15.422	3.96322	11.0272	233.665
7.30944	116.682	12.7153	4.1201	15.2269	1.16945	4.20717	11.2847	9.08388	3.49484
6.89435	5.76694	24.0495	3.18484	9.33909	0.0397823	33.535	53.1199	6.20379	17.2062
29.478	15.4693	6.18277	53.806	17.0373	0.114093	11.3162	6.48377	7.40852	108.512
9.23851	7.97673	23.2847	14.2736	14.3134	0.465378	16.292	6.2826	43.651	59.1863
16.4376	63.2486	17.6971	43.4581	7.23213	1.15669	12.942	6.69619	17.5282	51.1075
7.62244	22.2638	26.8733	5.95684	5.13717	4.41659	6.36442	11.8259	20.9202	44.1284
28.4233	3.42879	3.94746	24.1801	9.60781	4.70632	55.3034	12.5855	162.68	7.50985
35.3117	35.0009	11.711	4.52993	53.2302	4.48264	13.7039	5.53049	4.9195	26.3952
13.5695	67.6254	136.122	14.9807	23.9647	2.54081	6.88609	8.38731	14.4185	16.6846
14.2211	23.2291	48.9157	4.4301	9.26253	1.87502	9.74592	53.9613	16.0548	12.6658
26.9912	9.39989	272.503	15.4978	4.04053	6.41321	4.95553	25.2895	29.8968	115.654
6.48752	36.5277	98.6159	9.27454	8.59223	7.30494	22.8493	17.8127	17.7249	104.116
21.7347	16.4474	20.1103	3.69901	12.6996	5.46744	16.6275	14.8043	9.10565	5.50497
32.4669	44.5712	35.9602	14.1955	18.1437	4.96153	4.03002	155.324	2.6489	24.4241
20.578	52.4181	96.8977	27.2186	6.45675	11.4506	13.3609	14.4312	3.386	3.96622
18.5491	36.346	67.4596	315.991	4.10809	12.8017	4.90974	5.68587	37.6836	73.0561
37.0058	10.5363	10.2796	21.1357	19.2059	6.85457	58.7908	10.456	6.81254	47.2772
13.4164	20.7581	12.3896	9.28354	20.6223	12.4609	8.37681	17.9088	7.69901	49.1214
11.6487	8.38206	12.3993	23.9452	16.057	17.3098	6.4057	23.2606	21.4945	30.2541
17.4802	24.1043	15.7425	19.6337	3.42503	16.4932	63.9062	127.568	5.20923	44.5329
6.80203	49.0111	296.541	10.17	4.19816	5.91781	15.6945	43.8454	7.46256	13.3594
36.8129	13.228	37.3106	8.63427	9.27303	3.92494	7.72378	84.9473	108.998	15.2366
25.7166	11.341	27.997	15.5999	19.3057	3.97523	8.17264	20.039	142.845	4.617
70.215	6.44023	92.5254	4.25896	65.2385	3.30043	8.31	10.6632	14.9514	4.21768
19.7163	33.1822	9.36686	2.87258	16.298	7.38075	13.3609	6.6414	86.131	4.34678
36.8129	8.98855	50.2226	8.20642	11.1526	3.55789	71.4738	8.91649	159.629	129.244
23.0272	15.1706	20.5742	18.5768	7.21636	4.89998	10.9349	8.35129	6.18653	3.70126
17.7031	71.389	32.6853	15.3305	11.2201	3.29593	13.2002	102.368	29.517	9.61231
16.1366	101.248	141.704	9.22049	8.54494	11.0542	15.6945	19.0948	47.5151	9.46594
19.4115	5.80822	47.3229	9.07562	17.0088	15.9407	16.6928	35.4498	29.5125	35.1616
33.2475	6.31563	9.1732	5.27904	7.61719	3.56315	6.98818	9.17921	4.09308	11.3755
18.2391	157.223	22.2241	14.745	13.0358	3.1443	4.08632	100.006	11.1541	82.4035
9.80972	19.3913	8.03753	5.33083	12.7003	8.74761	9.544	23.2637	8.38131	7.81535
10.79	115.819	13.8825	36.9	4.41509	3.1991	21.3068	62.0544	3.54063	3.49634

## Sheet: Length
Pinus yunnanensis	Cryptomeria japonica	Pinus massoniana	Pinus densata	Quercus glauca	Stipa capillata	Miscanthus sinensis	Neyraudia reynaudiana	Arundinella setosa	Cyperus cuspidatus
Evergreen coniferous forests				Evergreen broad-leaf forests	Grasslands	Herbs
3.93844	3.01962	3.7749	5.88414	3.59321	2.87266	2.29559	8.60274	6.79652	16.4769
3.32847	15.4421	2.90496	3.65247	4.06885	5.76975	2.19304	2.49962	3.09389	6.88715
3.80074	3.90688	2.20586	23.5927	5.20501	4.76189	2.47101	5.64222	10.6397	8.238
4.12707	8.8691	2.74315	10.1755	2.24419	2.17285	2.32877	8.30778	4.55258	5.94123
14.4679	8.28564	5.0883	6.10192	3.90737	4.70679	3.18992	9.17696	5.75205	4.14704
4.44011	9.48422	2.2666	6.44244	6.95293	3.12071	3.5086	4.09474	5.00795	5.06764
3.41932	5.70844	12.1721	3.94005	13.2661	3.86321	3.06973	8.03214	10.8446	4.65638
3.83855	10.0959	5.44723	2.20052	6.9863	1.8406	3.90921	8.03214	2.93701	6.07244
2.76008	4.04855	5.70592	5.31658	3.58934	1.36523	6.08663	1.83562	5.14644	5.27047
2.96827	6.83693	2.86625	19.449	2.66849	1.61644	4.10981	6.66326	8.59682	4.77301
7.29638	10.0013	3.04088	5.67123	7.938	2.79203	4.24123	1.76082	4.64948	7.59534
3.5077	18.6639	3.97359	4.38907	9.04348	2.44581	3.57918	5.07493	12.3488	4.62033
5.12712	11.9892	3.49625	6.25038	10.8595	4.4074	3.86822	4.45507	15.0777	5.69107
17.3866	17.1889	4.51493	2.45019	7.73249	2.80685	3.39625	3.63074	3.58745	11.9732
2.95351	7.6226	12.2536	6.25079	6.93378	3.51077	5.77581	9.46715	6.81712	5.74575
2.99767	8.82414	6.20395	4.96573	4.41493	2.88307	2.41096	3.34863	4.12784	4.9374
8.05255	2.9206	5.45729	2.7529	13.5291	2.0094	4.66011	3.17159	3.91521	8.01225
11.34	7.46041	23.3669	3.96252	7.12926	2.12066	3.03759	5.00586	3.95899	3.01438
5.94222	6.69132	4.49178	5.05016	4.48153	6.24088	5.13819	1.65556	3.63762	4.10353
11.3215	4.18389	19.2989	9.12562	5.02252	1.39055	3.09227	2.28723	11.246	3.78616
9.19932	4.918	12.9252	3.46627	4.87348	2.0809	3.78641	6.22027	6.73074	5.76214
16.6878	23.9605	4.91205	12.5879	4.57425	2.54655	3.66638	8.46088	3.60195	5.7734
7.40411	5.38726	3.68353	3.65173	5.71858	2.78638	5.09375	3.29786	14.7579	15.1476
8.48737	8.69551	5.32712	11.2621	11.2488	1.41918	10.3402	4.73953	6.86679	2.75679
5.51005	2.63781	5.58236	3.87071	3.68142	2.66814	4.68274	3.16238	4.62967	3.79241
4.75488	19.408	4.88499	5.73373	8.04071	3.43967	2.44658	13.9867	3.7966	5.22449
4.65753	10.6681	8.5117	8.32433	2.89989	1.57238	1.85011	4.39753	3.30403	2.29589
6.05729	4.51482	5.48742	2.8783	4.8777	5.63192	6.60142	4.93523	4.83392	8.75584
8.06088	24.1095	6.052	4.48833	5.6037	2.99797	4.39767	2.92485	6.43581	3.39879
3.52526	5.79244	9.64038	12.6536	9.37447	4.25175	2.79356	6.76712	6.65304	11.1244
5.72655	6.49216	4.22786	6.33841	2.49641	3.37159	4.18129	3.49877	7.63296	7.72893
2.89088	4.8029	4.02521	4.78323	1.84756	3.78279	4.856	4.98499	7.6251	4.8277
3.73463	2.38534	14.6769	9.34351	4.22619	6.41345	4.9177	2.31216	8.87132	27.7265
4.26981	2.18148	8.86195	10.2543	4.83195	4.14515	8.24644	5.89847	9.16493	4.33068
9.77674	13.159	10.2013	3.77625	3.41523	2.03197	3.50567	3.25236	3.08781	3.39156
5.46466	5.07816	5.00671	6.98797	5.38312	3.93967	2.62567	3.38688	3.79652	7.54759
20.7182	11.1895	4.31679	11.2439	5.25008	3.18384	3.46016	8.87318	8.59956	5.10948
2.59751	6.51677	3.18351	7.67049	6.11904	3.95205	3.75805	4.66934	4.1429	3.09148
4.95942	4.81959	9.68696	6.39219	5.23178	2.67397	2.68723	3.34266	5.07389	15.9262
4.41515	4.22674	22.1815	4.52247	19.6721	2.63118	3.89041	7.2923	3.71616	10.3504
2.19178	9.83901	3.98797	3.6186	16.8268	6.52808	2.17074	7.68351	4.2129	8.15153
4.1934	8.95605	8.45455	7.02005	4.53962	2.30137	2.05332	11.8547	3.87573	4.11542
2.89767	9.69814	4.72636	2.95693	3.29838	4.05542	4.28636	6.00247	6.27192	10.8221
2.77578	5.02953	3.28027	4.75737	4.47085	4.07123	8.87518	2.08732	6.2323	2.76964
7.99479	8.88679	4.31044	4.90855	6.45874	3.5029	3.23022	6.83564	8.00096	8.10863
7.91704	22.2775	6.20885	6.37049	3.50685	3.18079	5.10153	21.954	5.04836	8.50556
7.71044	2.62553	6.72055	8.89542	3.65419	2.35827	5.96712	4.19625	10.6957	3.49337
12.9075	4.67181	5.78647	4.82636	5.38597	2.59671	2.2089	3.43408	4.76658	8.43836
3.28951	2.59219	3.33863	6.41121	2.49825	2.02121	3.8423	2.70663	5.67066	4.73238
3.93115	5.46882	3.50685	3.47093	15.0677	1.96449	2.90268	3.69619	4.57433	9.72022
2.95184	5.12959	4.62389	9.14252	2.59433	1.66452	3.39726	3.75814	11.4176	3.11918
4.23822	10.0807	4.90945	10.725	3.45764	2.9589	3.74266	5.8294	4.29066	3.82521
19.8369	6.32468	6.15668	6.00293	3.44236	2.88734	2.47973	3.04307	6.61822	3.37803
13.4199	8.1591	5.4191	6.4731	5.56951	3.4449	4.88868	4.68844	18.7552	12.0212
7.26721	10.7775	3.64348	5.92129	5.1129	3.58222	3.4509	5.67129	6.58266	22.5962
7.90405	11.1037	2.85321	9.51658	5.04342	4.52293	2.8231	4.07992	3.77789	5.45627
3.6083	15.7129	7.11296	2.56249	4.68444	2.14129	3.04447	4.24068	6.27277	6.52203
5.54986	20.5054	4.00077	3.36844	3.8937	4.96227	3.98814	8.16468	7.39148	4.38195
6.44597	17.6703	4.13203	5.94348	4.34912	3.62781	7.06447	4.84668	6.23036	3.0411
3.68532	6.38356	4.73784	4.5923	7.62449	3.22521	3.31682	3.95619	3.94592	3.68178
7.65833	10.658	12.8401	2.84403	6.13375	3.64137	2.96504	2.2254	4.37477	3.19789
6.30677	5.07849	3.12019	4.5263	2.78301	5.86616	2.42849	4.33827	7.07419	4.21784
4.21918	3.61701	21.8904	6.4983	5.3803	2.18847	4.97995	1.8926	5.2494	10.8172
5.87129	7.36236	3.33266	9.21764	6.12107	2.21518	4.92279	4.68885	9.51334	17.1298
3.02071	11.1337	21.4236	3.93759	18.8605	2.27164	2.77068	5.04079	3.08027	3.51238
2.8546	7.73732	7.63279	2.86808	7.11425	2.09649	3.42838	2.80422	3.60934	4.51049
2.85208	6.30923	6.05068	2.65789	2.6934	4.0943	2.67471	4.57025	3.17233	5.28263
3.91945	10.021	7.35805	2.21474	2.96786	1.95625	2.56586	3.63504	4.17663	5.70882
2.94578	6.78403	7.71433	7.86753	7.10668	1.77378	2.332	3.61342	13.1526	8.93688
12.7123	7.01879	4.91896	5.80277	10.2677	4.05233	3.26575	3.55463	7.24616	9.84471
4.77332	5.19129	8.22145	4.20359	4.12915	1.99715	4.7874	4.56233	6.29167	7.54384
3.21014	11.2053	3.61556	4.47586	4.65997	2.97279	4.38132	2.53581	2.95077	4.47085
2.45101	4.1589	5.50186	6.11052	4.3423	2.62682	2.88567	5.02948	5.5071	6.40197
3.29337	7.86085	5.39712	5.17304	1.90603	3.75208	2.64553	2.3114	4.05022	2.07452
4.17047	9.19827	8.92825	4.35488	3.52663	3.12852	3.46995	4.97729	9.96992	4.20712
20.175	13.4997	9.45164	7.02208	4.53085	2.52608	7.93058	3.7003	3.15047	3.35351
7.45732	6.3063	8.56386	6.14162	5.27159	2.74542	3.27858	7.92578	4.5737	8.91386
6.06852	4.61986	3.26855	5.73679	3.42595	2.68926	2.40186	3.47655	3.94093	4.63244
13.9964	13.01	5.5211	4.36523	3.25592	1.26222	4.27345	7.80178	4.98077	2.60578
6.37104	6.14699	4.6949	4.2	5.04079	2.68011	5.07408	2.55603	7.86255	4.46896
3.21068	8.12211	13.2421	5.61145	7.62764	2.36071	2.73712	4.58918	7.13066	4.03753
5.66238	2.44507	8.622	10.998	6.48521	3.23288	6.24901	5.95858	6.97397	2.86937
14.7096	6.14699	5.16362	3.94258	7.56879	2.21953	7.32096	4.29586	3.65896	13.6577
7.72093	3.67926	5.06586	3.84071	11.0221	1.812	4.00962	3.63132	7.32737	9.55512
7.28896	6.42732	5.29351	4.2003	5.18622	1.42044	4.53315	3.64384	5.82447	4.10052
10.9592	26.9053	3.38104	19.4489	7.37729	2.87496	5.29753	5.6391	7.71367	4.80225
7.02178	11.1188	17.2686	5.87899	6.08219	3.74079	4.83488	3.45879	3.38978	2.82932
16.189	6.03148	10.4807	4.0034	4.26808	4.01581	3.16093	4.78658	8.88945	9.77616
6.58518	13.8764	6.45463	6.964	9.65934	5.30814	2.14532	3.82038	4.84392	9.77616
3.56644	15.866	23.174	6.83392	5.64649	3.77085	2.33359	10.2819	3.04375	3.09008
3.2209	4.96312	7.39658	6.8491	9.51786	2.44521	3.6109	6.05088	8.07055	4.03058
2.93288	18.9104	2.69923	7.04795	5.21586	1.96784	6.35921	4.99786	2.85359	7.99737
5.33614	6.22592	5.24405	6.49008	9.43455	2.83888	6.7546	3.40085	5.01068	7.67345
2.68044	5.48805	3.82518	8.95981	6.36816	2.24723	8.3629	3.99014	2.97126	6.12762
5.25085	5.45882	5.436	9.61501	2.53142	4.6486	2.41452	5.07025	5.00285	4.85189
7.52266	8.6469	7.72901	5.44951	3.19474	2.0274	5.34899	6.42482	10.5051	6.41452
5.96195	2.32362	4.62847	2.6803	3.97795	2.06173	6.67836	5.0314	3.04375	4.77416
5.948	8.98463	7.00014	2.12258	3.16077	3.28767	4.40622	10.2757	3.68153	5.68044
6.78929	6.57263	14.0463	2.79307	21.5199	5.074	3.88559	8.5391	3.97405	2.6923
4.0374	8.35849	11.1309	9.34841	10.2847	3.01441	4.16759	12.7658	3.33775	4.96225
7.32436	3.51773	22.0417	11.2679	6.78745	3.96797	4.82619	8.86038	4.51668	4.42523
4.70962	5.20384	8.8229	2.33726	7.01214	5.1734	4.43636	3.822	5.80233	8.8731
4.20545	5.36526	6.34792	8.46575	6.25888	2.40712	4.62173	4.28855	9.40329	4.13285
5.91299	8.29937	7.15337	4.32318	6.89362	1.84962	4.26247	4.2271	6.8946	2.4274
4.97742	8.87099	6.29858	5.94973	4.71696	3.86477	2.36953	4.29173	2.44929	8.70751
6.60874	8.25674	3.59488	6.4957	5.53452	4.66014	10.923	5.53381	10.7331	6.39044
2.70353	9.47658	6.48989	7.33647	4.59616	6.81482	3.52419	7.60915	3.78162	3.83047
4.12175	5.70005	3.21548	5.09797	7.19134	8.30742	4.80082	3.32173	4.80767	2.55058
8.25849	10.0956	3.76005	2.77175	3.454	4.99953	4.76079	3.57219	7.45466	3.91236
8.44266	6.78811	8.97737	3.7863	8.21334	5.46099	2.23145	12.4723	18.9055	3.83444
4.86227	9.99458	19.3156	4.30978	7.68312	4.37216	11.5193	3.63896	9.03975	3.52252
5.51074	11.905	7.53414	5.24658	13.1718	4.92836	15.9006	3.57638	10.6167	3.40718
6.05052	18.8122	6.76422	5.11723	12.7952	1.81737	2.48896	4.26893	8.44216	4.34277
3.64208	17.1402	4.98866	12.6037	18.6365	3.18005	13.5982	12.6769	8.67827	3.4966
7.37263	7.61811	8.21918	2.85874	3.94258	1.91137	4.33384	10.7877	7.66959	5.01633
13.4188	3.59427	7.34611	3.50096	8.99389	2.36521	2.52819	5.51216	8.19033	7.67515
5.43351	14.1741	11.0859	2.85244	10	4.06882	5.91471	15.2475	5.79573	5.63556
5.96915	17.0514	10.0593	7.41756	5.14493	4.92836	4.25797	7.10805	7.41822	5.84962
5.29104	8.91647	6.59474	5.6909	7.49641	6.03871	3.77208	6.04047	4.33027	6.13515
13.4755	5.27093	9.67764	6.61699	5.32825	1.86795	3.40104	6.87096	13.2004	6.73674
17.4642	3.9634	10.9493	2.94466	3.15981	3.15989	3.89334	7.60189	15.3754	2.84647
11.024	13.2403	7.75268	10.2987	3.48433	4.97447	3.99233	8.6309	6.95518	4.5763
4.69132	3.58762	5.2589	5.14077	2.51101	2.9883	2.58526	4.64948	6.85559	15.9369
5.15441	6.91912	10.8273	9.28132	2.73523	5.53874	5.93386	6.04721	22.7278	5.88444
4.5451	22.6449	10.8273	12.5038	7.88375	2.92233	4.53247	5.9197	4.19784	4.69134
5.11789	7.33868	5.3651	8.26151	3.44082	2.36721	4.40663	17.5924	7.22614	5.6671
11.5698	6.00145	7.56658	6.42901	4.94567	2.21948	3.59529	12.8733	5.28101	6.93326
20.9731	5.38249	4.60658	3.91748	4.50266	3.03784	4.43063	4.11014	6.4249	8.12181
4.24099	3.83392	4.29175	12.319	17.9593	2.30301	4.95258	4.75797	9.39521	3.39011
13.5343	6.99784	5.62529	2.35151	4.74668	2.51847	3.83825	7.51205	4.62592	4.09389
4.91778	9.98329	4.57658	4.51184	7.38025	2.49315	6.82907	5.9774	19.1714	6.04551
13.4936	13.5337	8.09142	9.16197	9.49504	2.2234	8.61975	5.78356	6.04926	8.43775
9.04545	4.99816	13.1018	10.9997	3.48351	3.89315	3.3486	10.0538	5.49688	12.138
7.53959	11.522	2.81197	3.74148	3.03701	2.17915	5.51151	7.23515	13.5086	5.65764
6.25819	4.63559	5.77181	3.97038	3.0943	2.92244	9.64175	4.16995	11.1173	8.11704
7.83419	6.90085	4.70608	3.46773	5.89855	1.67729	13.1882	9.78564	4.0606	4.15907
10.3744	7.05753	4.76619	3.32611	8.13658	1.82753	3.1857	3.27589	6.23219	2.95304
4.39762	24.2846	3.83159	6.38318	3.77912	2.50058	5.03082	3.96627	7.49885	6.22318
4.04825	43.2206	5.38263	6.33195	4.51342	3.23099	6.30115	4.02627	5.22904	5.08197
9.80745	6.63866	11.1978	10.3397	13.0443	1.87732	5.39868	6.21121	4.01159	3.93816
7.60775	15.28	6.58863	3.27025	7.61682	2.20841	3.86318	5.6523	2.55934	2.10978
8.09553	14.8543	10.7227	8.9263	7.86301	2.70389	3.51068	5.43989	2.99614	4.59285
10.5345	4.38088	6.07184	5.00595	11.1878	2.89452	3.46318	3.89392	7.71904	4.30984
6.35126	12.1097	4.54375	8.43726	2.88537	3.364	2.22641	6.94148	3.9437	4.74726
4.18175	10.634	13.7132	6.56205	2.28019	3.39825	4.0903	4.93455	2.3646	4.19507
19.3096	13.5224	7.34241	3.26351	9.14863	3.36197	6.13838	6.034	6.78811	5.82468
7.09852	5.32778	3.74471	4.0049	7.11433	3.69704	7.61167	7.66479	7.59389	11.361
17.9924	8.00915	13.8465	3.00296	3.10699	2.32797	4.88904	7.68033	3.82764	2.26342
17.5759	4.77307	7.3811	5.1997	7.00175	4.47923	3.63896	3.88132	5.73493	7.03759
11.3279	27.312	4.4763	4.0371	5.28523	2.21548	5.80005	3.7026	2.91907	11.8928
5.87723	3.12134	2.67732	5.64852	5.23288	2.23523	6.88863	6.46123	5.26795	7.78537
12.6386	4.87422	4.03808	5.84844	5.87652	2.51044	2.70778	4.61019	10.4755	2.60156
9.03589	6.40211	3.41175	5.0411	3.77436	3.66477	3.17323	11.0369	5.94742	16.7675
21.2657	6.12808	4.27093	4.37995	3.81997	2.73545	3.29981	8.19403	4.07964	6.0651
5.72216	3.75433	5.88132	4.2	3.91332	2.2706	6.22197	4.10047	2.92047	4.17559
7.97668	4.03403	11.2996	11.0202	4.49649	2.50362	4.79452	6.1254	6.83852	4.65841
7.19962	3.20093	6.44575	5.62584	4.26236	3.75781	4.34679	4.32707	9.15403	12.5506
6.27603	26.696	2.63014	6.99112	4.04967	3.39288	3.48162	6.11145	25.0221	3.00055
13.7704	5.87255	5.50151	12.6044	3.36345	3.42422	3.44449	3.50247	4.93019	9.17975
9.2546	4.46718	5.71844	3.94258	6.89184	6.07674	2.33751	6.14247	7.8231	8.73707
5.71499	6.76249	5.20351	12.2909	3.61055	2.2666	2.76041	4.75334	5.56625	5.50074
13.7111	6.46208	7.15137	8.17142	5.92414	1.60466	2.82595	6.20041	7.3817	8.26756
6.34205	10.5955	8.2389	4.20027	3.98981	2.5546	6.82323	4.00608	11.7238	6.76386
9.3014	3.36378	3.96151	3.87532	6.3837	3.31071	4.88455	7.85814	17.7094	2.59488
11.2157	4.37364	3.48077	3.05466	4.82178	1.72603	4.14364	10.0276	5.63337	4.44951
31.6198	3.44548	7.6249	19.464	3.87592	1.44447	3.61485	5.42301	12.5206	5.89926
7.65912	5.75208	28.5728	5.60189	3.86126	2.15038	2.86137	6.06811	6.62364	2.60937
6.27663	30.0388	4.32362	4.00293	3.11901	2.176	2.6914	8.72696	7.30573	5.18849
3.5023	13.4199	9.02364	6.99959	14.2276	2.27773	5.01614	8.44058	3.46537	3.67258
6.32871	10.6385	5.95427	7.04805	8.16014	3.03945	4.67375	5.60775	6.55644	6.67159
11.4013	2.52364	13.5005	8.95981	4.72249	4.89523	2.73427	15.4278	5.35195	4.46795
7.81564	5.22447	9.34422	6.84904	2.83175	1.59795	2.54849	7.12764	21.2662	11.3374
4.71468	13.6702	14.7525	6.87038	4.62247	5.6577	3.8463	8.54351	10.4343	7.15775
9.9291	3.2626	3.73915	9.62208	4.2914	2.47973	2.76071	6.83723	5.33447	11.5735
5.42107	7.80485	8.24573	5.49381	3.26679	4.23422	3.55833	5.62737	8.48652	4.71863
7.53356	14.1684	5.11545	7.09112	3.32156	3.19529	5.54822	5.24145	9.13537	4.18671
5.32647	11.7017	8.04436	4.38441	3.24496	4.89649	4.95197	6.36356	4.78381	4.44888
12.1862	8.32973	7.21436	12.2225	5.40219	3.10553	3.3554	7.41737	6.68093	3.05205
8.846	32.8153	4.6451	4.0923	10.2653	4.54619	4.02953	11.5981	5.15019	4.41252
13.0284	8.26745	5.74485	18.7477	5.13085	2.41003	2.83795	7.49718	3.57592	6.79786
6.7966	4.62789	7.52205	6.76548	4.13737	2.20545	3.3526	6.72781	4.63416	8.11334
9.5814	4.45893	4.26055	10.3356	4.62622	4.49655	6.47899	6.04841	7.73263	9.06227
13.418	4.69074	3.25679	13.3398	4.13989	2.14693	3.93173	5.95356	5.06962	19.305
3.78849	34.0678	4.55937	10.1858	5.07348	3.17808	3.82532	5.33822	5.98364	2.44419
9.8463	28.7688	3.29797	6.49627	2.7417	3.43268	3.59918	3.97592	2.628	9.24871
7.9731	11.4896	4.45449	4.58501	2.44318	1.89852	2.46101	7.29986	11.5615	17.9827
13.7787	40.9871	3.92279	5.51104	7.92907	2.02641	3.27488	3.33211	3.82532	5.31005
9.90268	6.08063	4.78474	8.16616	4.59564	2.35712	2.87726	3.9686	4.37416	12.3354
8.50329	3.42668	4.27236	4.43836	8.08252	2.32877	5.38603	6.51942	16.6051	5.14129
5.94545	5.80447	14.5651	7.72948	4.38425	4.37282	3.98386	5.80822	18.5094	9.15649
7.18036	9.52792	6.54532	5.73205	11.2743	3.69468	3.01658	10.5684	8.87488	7.91019
5.32844	16.0148	6.97447	4.42359	2.1377	2.19893	6.06956	8.65463	4.6529	2.65877
8.1174	10.7929	9.06515	5.13027	4.13899	5.02948	3.84375	4.89863	5.9391	7.38975
5.76315	16.6449	4.75937	4.7897	9.79879	2.1554	2.52027	5.77647	6.75997	3.20482
18.08	7.56321	14.725	3.92101	9.00373	3.11551	3.70167	4.98255	4.0277	6.97014
18.1419	8.67033	6.56729	4.36063	5.14351	1.72419	4.97463	5.23479	9.38288	3.89614
3.57093	3.46008	7.39532	4.51699	6.02811	2.67668	4.1734	9.97101	7.05775	6.0283
13.5549	11.7903	6.73545	4.79973	3.19512	4.76784	3.5066	7.45318	9.38299	9.13238
14.4345	18.646	3.72148	5.0017	5.54049	3.72488	10.6236	10.3378	9.38288	7.83616
5.69427	5.75071	6.92058	6.81104	4.6774	1.73893	3.8203	7.52989	4.55359	12.8012
4.08301	11.6461	4.54115	6.7657	3.74077	5.04441	5.6209	4.25077	8.55258	6.71375
4.8637	6.06329	30.545	7.89989	5.15852	1.95836	4.32679	4.57529	7.48803	5.87074
18.2369	3.67123	11.1507	6.86244	6.22866	3.66167	3.57063	7.55537	8.1163	6.71375
5.1689	3.82756	15.8981	3.78595	4.94258	1.94521	4.56474	3.65099	5.19784	5.65271
4.45989	10.2121	8.88129	4.01121	4.63348	3.8297	5.23603	12.0767	7.84885	3.91644
8.13249	3.48751	5.906	3.27597	5.04767	2.13748	3.83581	5.15904	4.61833	2.95499
4.67784	8.79389	11.3207	4.28589	5.76227	2.06904	4.83082	7.28633	4.76452	4.66921
11.4903	8.58047	4.5143	4.45652	4.75449	2.6229	3.51011	2.60274	15.7081	7.61356
11.3698	6.41449	12.2723	4.04767	3.73934	3.97203	4.85252	5.76186	2.97723	5.62918
6.03351	5.82904	7.80479	6.05647	4.09701	3.63375	4.31775	5.8391	3.3583	12.2891
11.459	3.10767	12.1142	3.11427	4.81707	4.8397	2.83753	6.2286	2.56871	7.1523
10.9776	17.8159	5.47696	3.74649	3.75036	3.42874	4.46373	7.99005	3.54096	9.32337
10.0065	3.6051	9.20244	7.89132	7.64175	3.0346	3.13332	6.16827	4.69833	7.24189
4.36871	2.77803	10.4064	3.85975	2.86395	6.65238	7.35671	5.35282	3.03682	6.29477
6.49959	30.0295	6.20425	6.17332	2.30633	2.69178	2.50721	19.6813	7.32096	11.2776
3.72137	6.3966	8.29342	5.46208	3.93737	2.85452	5.08866	3.01825	4.34148	31.6584
3.96696	15.3247	4.74682	2.61871	5.41203	9.99323	2.48411	8.67219	5.2466	3.14521
4.53745	3.67693	10.0474	2.60907	3.63403	1.75874	8.75342	17.4699	5.13118	5.58825
8.19288	5.56	2.94567	10.9029	6.78427	2.42696	5.73962	4.50879	4.73712	17.1771
3.64874	5.81937	8.4303	4.80537	4.59471	2.26671	6.1011	4.3731	10.8988	13.3733
5.71036	16.1619	7.92422	9.09844	4.66586	3.35726	5.60197	4.57584	9.39022	14.6195
3.27019	6.43142	9.70863	3.28249	2.71233	2.16211	4.31852	5.11047	7.77337	14.6732
7.0383	2.82901	2.87175	6.37696	6.51507	2.20849	12.3273	4.6231	17.9373	4.09422
8.3649	7.43586	6.15318	3.0346	10.0384	3.17704	4.54888	3.74016	6.36263	9.41564
7.7406	11.1786	15.453	7.71984	6.52197	2.95575	4.16825	4.6797	5.44255	5.34751
7.14868	6.8746	8.20647	2.95688	4.69389	2.20244	3.89041	12.1824	5.32427	4.35975
8.94422	4.75951	24.6161	6.46362	2.89359	4.17553	2.67332	8.24258	7.70674	15.8476
4.89945	8.99638	12.4702	5.27107	3.52532	5.21575	6.64786	8.60052	5.5571	17.1365
6.95121	6.81764	6.00866	2.54849	5.23063	5.372	4.83315	7.34408	5.56271	3.84605
9.46564	13.7672	12.8481	7.40386	6.24953	4.40277	2.61805	19.3173	3.3834	6.19507
6.43836	12.4809	13.7198	8.212	4.32592	4.76619	5.95603	8.65337	2.78414	3.11584
5.82608	8.52145	13.9348	29.0211	3.90436	6.66282	2.75997	3.79077	7.87663	18.2169
8.10326	4.45521	4.4489	6.21233	7.32586	3.95521	9.23214	4.30449	3.56992	12.5757
6.90203	8.74321	5.50575	4.39151	7.62827	6.28668	4.42411	6.40685	3.90753	10.5847
6.27786	4.93836	6.27827	7.04504	5.07362	5.6606	3.39342	9.73663	10.4606	10.9446
7.97578	7.10603	6.04044	6.99721	2.50266	6.55847	16.3996	15.8912	3.83732	16.5203
3.62444	10.4045	36.6696	3.76129	3.66995	4.44901	5.28455	9.06258	3.96159	5.37219
12.2335	4.26537	8.55962	4.04238	4.96348	2.59153	4.98345	27.0801	12.375	5.69597
9.43186	4.89436	6.46945	5.24542	6.4386	3.10189	4.19227	5.44345	21.3414	2.68573
14.2867	4.69005	15.5416	2.38707	10.7125	2.71408	5.39279	5.21452	7.86559	4.29027
11.5015	11.5848	4.7157	3.02512	4.95679	4.71858	5.95603	4.41699	17.0982	3.04367
12.2335	3.76323	9.19953	4.82411	3.95729	3.01666	13.8986	6.48929	24.3987	29.6522
8.08321	4.82904	5.49775	12.3056	3.86027	2.69699	4.52364	4.7717	3.89392	4.52315
5.45852	13.8066	12.3891	8.10447	3.94474	3.94636	4.72704	18.0349	6.53326	5.30603
8.51123	18.5194	15.2065	4.10304	4.76748	7.08014	5.31926	8.81759	12.8144	4.53068
6.9874	3.11055	9.10277	4.46118	7.27318	10.8337	5.57159	7.57373	14.7769	9.19274
10.4076	3.63318	3.96721	3.83742	4.23641	3.13093	3.62419	4.11797	4.14129	12.1236
7.23016	16.7934	9.28822	5.75855	4.83997	3.13726	2.38411	17.3979	5.08523	17.4072
3.94781	5.38236	5.49318	4.0309	6.73238	4.59496	4.57534	13.8327	4.02351	5.98197
4.15025	15.2593	7.23438	7.95868	2.51236	2.30507	6.54279	19.0779	2.34022	2.7191

## Sheet: Width
Pinus yunnanensis	Cryptomeria japonica	Pinus massoniana	Pinus densata	Quercus glauca	Stipa capillata	Miscanthus sinensis	Neyraudia reynaudiana	Arundinella setosa	Cyperus cuspidatus
Evergreen coniferous forests				Evergreen broad-leaf forests	Grasslands	Herbs
2.75638	1.84521	2.57003	4.47438	2.71184	2.10244	1.95888	4.46575	4.18104	4.39647
2.45422	8.26101	1.93071	2.31537	3.3397	2.63962	2.11975	1.63792	2.6486	5.76329
2.64581	2.57682	1.99332	9.44422	4.22816	1.77282	2.33715	1.97463	5.74329	3.27742
2.27597	5.09386	1.31896	5.06899	1.93534	1.38877	1.83562	4.08019	3.17967	2.72112
3.9466	5.90326	4.53351	5.74956	2.49838	3.32742	2.00452	5.97455	2.02022	1.95364
2.86638	5.50932	1.45296	4.72392	2.02126	1.62236	2.87852	2.38145	2.26299	2.12345
2.55595	2.36704	6.14247	2.57608	4.45682	2.49556	1.69384	2.61742	2.27414	4.43641
1.8477	5.49562	5.07099	2.11595	2.84932	1.31471	3.46499	2.61742	2.2006	2.47663
2.04805	1.98899	3.81592	2.80844	3.47151	1.20762	5.34099	1.58904	2.25726	2.44052
2.26827	5.54575	1.72989	12.7311	2.02427	0.958904	3.29589	3.04688	3.58863	2.62899
2.5103	9.1009	2.45041	3.72603	6.0623	1.11093	2.77904	1.29896	2.52063	4.83044
2.99753	11.8658	2.33356	3.594	8.61444	2.15181	2.77921	3.9109	7.48482	3.73847
2.30523	5.76123	2.91099	5.892	3.17088	2.98729	2.28581	3.36049	3.84455	3.6043
10.2385	7.67611	2.98584	1.37573	5.63096	2.44315	2.80773	1.57838	3.14611	5.87441
2.01096	5.86795	9.89595	2.43216	6.26493	2.16819	4.15082	2.25047	3.50197	2.02784
2.10838	3.06499	4.3746	4.90386	3.6731	1.86825	1.91781	1.65326	3.26438	2.88718
3.35419	2.61995	3.71507	2.35153	7.41392	1.54381	2.95666	2.91351	1.83112	5.4126
3.99079	4.78274	9.76611	3.17	2.04367	1.36197	1.9269	3.10532	2.3637	1.84567
3.26345	3.80537	1.74847	3.5694	2.30153	1.24192	4.98778	0.818411	1.63315	3.44079
4.22214	3.31441	3.9897	5.84992	3.79433	1.33737	2.29337	2.036	4.42449	1.7443
4.95285	4.33216	5.08337	1.69679	2.12225	1.28074	2.73973	3.30436	4.6094	4.53926
7.81356	16.8295	2.45767	4.8577	2.95712	1.66425	1.48745	2.35923	3.44882	5.11967
2.77836	2.43049	2.08658	2.64836	3.7429	1.048	2.47677	2.51027	13.5812	13.5443
4.50614	5.08334	4.34556	2.51219	5.2583	1.40274	4.0683	1.43888	4.95205	2.24219
4.08899	1.97808	5.24485	3.8689	2.3509	2.46534	1.5054	2.26578	4.42107	2.72882
3.42134	12.025	3.97455	1.49142	5.62521	1.74789	1.49485	5.80737	2.36797	2.24463
2.01611	10.2989	7.02233	7.83816	2.30975	1.32575	1.8011	2.35827	2.72288	2.1746
3.51422	3.9831	3.63444	2.52148	2.41422	1.88238	5.04652	2.01282	2.55192	2.35992
5.15014	4.84359	3.55638	3.24858	3.16222	1.9214	2.15488	2.32353	3.48123	1.9346
1.88926	4.61427	2.34871	7.54348	8.24732	2.44666	2.32797	2.73973	2.76241	6.19137
2.35071	3.16849	2.44915	4.87614	2.19403	2.88405	2.93099	2.04441	4.76608	5.17611
1.16337	3.08219	2.78537	2.61184	1.80838	2.17244	2.29356	2.16153	3.30468	4.73847
2.69479	1.66975	14.2756	8.4826	2.79238	2.54137	2.54214	1.69805	1.898	8.42816
3.72863	1.58523	4.8809	3.74195	2.64545	1.56663	3.21904	4.05318	3.81866	3.18055
4.1329	10.7777	3.94995	2.81712	3.30778	1.49775	2.35625	2.27252	2.93948	2.5534
3.85581	2.56277	3.54849	4.36789	3.61773	2.35362	2.56677	2.13836	2.7234	4.07759
6.56022	4.00759	3.37466	4.59567	2.95652	1.32641	2.97479	4.63545	5.63723	2.2311
2.42597	4.26874	1.62937	5.20586	1.89863	1.62732	2.86753	2.40822	2.66364	3.05296
3.54227	2.51967	3.78896	5.00712	4.00655	1.24932	1.94052	1.9269	2.50556	7.46441
3.98071	1.54274	6.1403	2.60515	11.4974	1.92515	1.78082	1.9869	2.31677	2.72123
2.08219	7.0343	1.70742	2.47592	8.05112	4.40252	1.96975	3.51562	1.2809	2.27047
3.70405	6.98093	4.77956	4.37167	2.72833	1.56164	1.58548	2.93164	2.0091	2.50953
1.76953	2.62781	3.04792	2.49844	2.35058	1.87025	2.31814	1.37416	2.40022	8.25896
2.55304	2.56614	2.25545	3.25795	1.79488	1.74252	5.39197	0.762192	2.25219	1.84915
2.67942	6.62381	3.72767	4.88249	3.16838	2.43504	2.7757	3.82186	4.47512	5.4591
7.3323	12.0928	4.74348	3.47899	2.84932	1.48608	1.96167	13.3625	1.65074	3.96167
4.69208	2.36874	3.55312	7.36855	1.67058	2.12225	2.02397	0.977096	5.56134	1.96416
7.93885	3.6394	5.53534	3.19348	2.74132	2.37992	2.18479	2.47255	3.04164	2.9863
2.43323	0.927288	2.94162	3.35723	1.63901	1.48781	3.11301	1.35255	2.92844	3.79532
2.41841	3.4869	2.21918	3.13112	5.95879	1.36668	1.89967	1.01838	3.85219	5.98436
2.11101	3.69548	4.13178	5.87252	2.24189	1.40233	2.90411	2.78975	3.05622	2.4997
3.92679	3.66682	3.27088	4.90159	1.73603	1.67123	2.66392	3.64238	4.25836	1.78608
5.84381	5.87578	5.45926	3.48016	2.24479	1.90622	1.54984	1.88227	4.79033	1.49507
5.68362	5.13581	4.17868	6.17625	2.06186	2.17707	2.81597	2.02904	4.9097	7.63249
3.43134	10.0551	2.29447	4.42548	3.98433	3.55696	2.02008	1.16792	3.85844	5.44244
6.3991	7.36668	2.80762	8.61879	4.69123	2.60386	2.56792	2.28581	3.04562	2.42537
2.23521	9.22329	4.18318	2.19477	3.35786	1.25542	2.00871	1.98071	5.69033	2.94468
1.75647	7.79005	2.13332	2.33277	3.07244	2.26373	2.63803	2.17712	5.69701	2.25805
4.22858	10.2971	2.84773	2.09329	2.74901	2.32345	3.41052	1.92044	5.56186	2.65753
1.69323	2.90411	4.43192	2.08337	4.43219	2.35019	1.60074	1.54381	2.7591	3.2586
3.85814	9.28699	9.44301	2.52723	2.4157	2.78416	2.69101	0.923288	3.80526	2.76904
5.59145	3.91353	2.57345	3.78436	2.15353	1.83126	2.41726	1.78416	5.35773	3.29811
1.94521	2.11595	15.3481	4.94315	3.15699	2.13748	3.12151	0.655342	3.04997	6.3097
3.25589	3.92784	2.76904	6.11153	5.50419	2.09203	2.46326	2.04811	2.56137	6.77427
2.07203	5.4757	10.1157	2.77025	8.76101	1.57162	2.72384	3.35923	3.02216	1.9637
2.57427	5.91556	2.65978	2.35836	5.55899	1.45595	1.43005	2.75866	1.98326	3.2266
2.33721	5.582	4.26984	1.28573	1.63756	1.16255	1.45134	1.70359	2.22244	4.9969
3.85485	5.66737	3.26277	1.58647	2.07236	1.27468	1.82504	2.1154	2.8403	2.2614
2.23803	3.70655	6.45586	7.05252	2.45463	1.17973	1.50723	3.20247	8.12959	5.19301
7.28767	6.28822	2.3003	1.96115	2.99668	1.23112	2.63249	2.84822	4.3966	7.65751
4.32189	4.19121	3.66036	2.59447	2.09301	1.22523	4.416	3.52175	1.50452	4.40299
2.14416	5.73342	3.04134	1.34641	2.52375	1.65499	3.91077	0.761178	2.65773	2.96877
1.85825	2.35068	3.19652	2.58304	3.05468	1.03307	1.71773	1.23395	5.21329	5.54693
2.44096	5.64767	2.85238	2.93345	1.70677	1.86945	2.05537	1.37633	2.3634	1.98789
3.11885	4.6551	6.02449	3.12014	2.04477	1.96753	2.23342	1.38986	5.33575	3.13753
7.40932	6.21003	4.73479	3.58792	4.31227	1.85378	6.1223	0.969973	2.27967	2.70471
2.73238	3.32523	5.82984	2.45764	3.3026	2.33978	2.27603	3.11496	3.58671	5.23668
3.02	3.48422	3.1829	5.34545	2.63521	1.70888	1.76868	1.84329	3.6029	2.73395
4.68175	7.09159	3.28871	2.80655	2.01934	1.11247	3.84641	1.55197	3.01408	1.70079
3.71822	3.79523	3.2671	2.89721	3.63479	2.17921	2.71523	1.42367	1.73315	3.28718
2.57019	4.84951	4.83214	4.39085	6.03137	1.83129	1.93353	0.972877	5.5106	2.31868
4.89266	1.65885	5.15471	10.2004	2.84512	1.80822	3.7874	2.07323	3.1357	2.75236
3.30395	3.79523	3.93334	2.39263	6.27408	1.27011	3.92025	1.70734	3.43433	2.58323
4.89145	3.40871	1.97863	2.84833	6.67764	1.78082	2.32745	1.11318	3.54701	2.66877
3.70975	3.5997	1.90934	3.93433	3.63244	0.900521	1.99942	1.72603	4.47252	1.75447
7.07526	9.82732	2.91882	13.5423	6.152	2.8723	3.67712	3.07781	1.83833	1.78274
5.30449	2.86197	4.63592	4.59945	5.0411	2.50521	3.63137	1.50992	2.99299	1.51047
9.64458	2.96268	3.07414	2.43636	4.15663	1.89362	2.28334	1.07	4.72584	2.9831
3.63414	7.76052	3.29647	3.14005	2.38753	2.04458	1.96893	1.11118	2.94805	2.9831
2.60608	11.3633	12.6264	4.21819	5.39515	1.93614	2.15915	2.02427	2.85677	2.25288
2.52997	2.41649	4.25619	5.92225	7.644	1.81542	2.32616	1.92529	2.89496	3.73877
1.5343	7.67079	1.91929	3.12863	2.59425	1.6397	2.7031	1.40932	2.11156	5.37564
3.06871	3.88945	5.09701	1.40145	5.48249	1.89534	3.37236	2.3163	2.44811	3.15395
2.40405	5.40518	1.9297	2.15348	2.84003	1.84041	3.57562	3.50203	2.1783	3.29255
4.91701	4.43345	3.87068	8.27397	1.87192	2.1731	1.56334	3.44452	3.68844	2.69121
3.85529	5.95877	3.74036	3.50016	2.14315	1.78082	4.79592	3.75249	8.57962	4.48359
2.63825	1.81332	2.09921	2.36784	3.29888	1.67208	3.1426	2.35274	2.85677	3.49384
3.16984	5.33868	1.89888	1.71411	2.07052	1.80822	2.73482	3.60589	2.57299	3.06671
2.92551	4.41551	10.3456	2.7889	6.06082	3.76375	2.7811	2.62942	2.84129	2.46205
4.01208	7.45093	5.63556	2.30386	3.93359	0.711507	3.40589	3.8289	1.4714	4.16584
5.02504	3.07055	9.9674	4.68447	3.06797	1.92104	1.73205	2.52603	1.58545	2.8029
2.82553	2.3814	5.20956	1.56134	5.78282	1.80121	2.82844	1.18082	3.79967	2.73307
2.3283	4.51679	5.31989	6.35616	3.06726	2.31578	2.74729	2.69479	5.16855	2.13378
5.25682	6.33249	5.37907	3.02227	2.76175	1.56142	3.59162	2.45049	3.42104	2.02192
4.25332	5.05732	2.55581	2.79488	3.03279	1.70737	1.89181	3.73641	2.19523	5.57058
2.50425	5.90326	2.57819	3.93575	5.30227	3.76608	4.62978	5.22488	3.88499	3.4194
2.46915	5.4923	3.66145	3.77896	3.79833	3.83019	2.21433	6.82419	2.12841	1.35559
2.14096	2.35121	2.75134	4.71877	4.43956	4.59715	2.04055	2.146	2.76718	2.06134
8.09759	5.46079	1.77696	1.82877	2.68419	2.39616	2.26367	3.23178	6.81595	1.42934
4.15353	5.53559	8.43159	1.10033	3.85627	2.5329	2.22107	4.32762	7.35907	1.96636
3.39408	9.09416	4.56795	1.86893	5.02649	3.04921	6.13934	3.49195	3.72534	2.20184
2.94162	5.71107	4.75488	3.43364	7.50249	3.40085	4.91334	2.33663	9.76255	1.38984
3.67819	11.7079	3.22381	3.78816	2.31767	1.76416	2.44123	4.16978	4.52704	3.24364
3.60334	7.63732	4.75178	2.86395	6.08805	2.61356	8.18921	4.65836	4.71685	2.78995
4.29792	5.85833	7.20548	2.59425	2.5846	1.7766	2.14781	4.28948	6.31293	3.32216
5.33112	3.43211	6.54899	3.27022	2.79622	2.08797	2.22863	2.36403	1.7971	5.89321
3.50532	6.24934	5.41466	2.38753	4.13699	1.28921	3.72537	8.44036	5.47408	3.93266
2.5894	8.42148	8.42132	4.82825	4.46186	3.40085	2.21225	5.88266	2.00334	2.79668
5.01633	5.38296	5.29564	3.27027	4.80227	3.722	2.78178	2.7323	3.9246	5.26915
6.62995	2.90416	9.33142	3.90003	3.48019	1.64726	2.542	2.77134	10.5496	4.4623
7.25027	3.09493	9.35529	2.36493	3.13868	1.81764	2.37622	1.78616	10.1375	2.54792
4.6009	12.1155	3.97751	2.93003	3.07518	1.70945	1.78726	2.51129	2.45597	3.97501
2.52704	2.86556	1.45551	3.08436	1.73397	1.9766	2.14416	3.15775	4.65304	9.78737
3.04008	4.53162	4.68249	7.79573	2.07786	3.28118	3.80052	4.00545	13.8274	4.1086
3.9551	13.1579	4.68249	9.45192	2.45025	2.17863	4.09847	4.25797	2.11282	3.63575
2.96753	6.22132	4.55162	5.10351	2.20597	1.49397	3.64608	12.6555	5.83962	2.25915
5.75277	2.21611	5.36036	1.92578	3.53605	1.70893	2.78795	3.85205	4.27647	3.38192
20.9234	4.17704	4.18444	2.77351	2.73282	1.57679	3.42545	3.97134	4.94934	3.49301
3.88995	3.60375	4.01312	7.53247	11.3134	1.38803	3.40107	2.25899	7.86485	2.28175
3.92581	3.12296	3.48277	1.96236	2.72184	2.286	3.3086	5.32701	2.97395	3.01115
3.36899	6.96159	3.25019	2.42764	4.68323	1.9726	5.24762	4.23595	6.83753	4.70507
3.30408	5.84115	5.82277	2.4346	3.95584	2.03266	4.43088	2.30781	3.70441	3.11978
7.41756	2.26915	8.67455	6.28937	3.13192	3.42981	3.17808	2.83033	3.47871	4.47789
2.52025	7.10263	1.83805	3.73592	1.99696	1.9583	3.31195	4.00912	8.57493	3.26874
4.98679	2.98674	5.32301	1.84216	2.67093	2.69099	3.38268	3.30858	10.0149	4.42737
3.73093	3.15507	2.45975	3.00279	3.3506	1.2326	6.04364	4.24068	2.02249	2.87236
2.30063	3.14899	4.25197	2.586	2.59595	0.802904	2.97504	1.9137	1.8929	2.76274
3.35148	20.0945	1.96367	4.91145	3.11477	1.42096	3.69715	2.38058	1.91501	2.60967
2.66849	13.0624	3.06759	4.12214	4.23247	2.52301	1.95301	2.18644	2.58581	3.8331
4.18745	2.2043	5.43225	1.83822	8.00184	1.81285	3.46099	2.85323	3.54937	2.25184
5.12285	5.94962	2.7763	3.02986	6.00356	1.61942	2.49211	4.20488	2.35288	2.09167
3.6366	6.1263	4.24992	3.47367	2.82192	1.43521	3.30211	1.39008	1.96811	2.80781
4.47337	3.53578	4.06052	3.07403	4.76227	2.62222	2.28241	3.33211	5.13545	2.53597
2.06249	7.03225	3.61756	5.50129	2.79997	2.15753	1.5729	4.23266	2.7431	2.92608
2.65	4.14277	7.04786	2.46608	1.97436	2.30833	2.43627	1.52581	2.33411	2.04189
7.24096	6.14216	4.76808	1.83142	4.99734	2.43896	4.51616	2.25019	3.22762	5.41668
6.03115	3.09479	3.37468	1.96395	4.86589	1.35458	4.52115	1.49718	2.1414	5.42992
7.57482	2.47877	11.352	1.58792	2.37288	2.30345	4.04715	3.38877	1.94332	1.63458
4.49622	2.1226	3.09797	3.62647	5.86008	4.08745	2.54849	2.41093	3.37989	2.86805
4.44844	11.0743	3.12805	3.48844	4.13542	1.93721	4.69975	1.5411	2.28359	5.30019
5.69425	2.01167	2.37414	3.51718	4.21918	1.91611	2.74545	2.24123	1.17912	3.57808
5.43189	3.76337	2.80271	3.39899	4.10444	1.25099	2.25008	2.55712	5.78677	1.8549
3.31781	3.26142	3.28625	2.32877	3.31074	2.72044	2.36959	3.47219	4.16605	6.6037
9.67071	5.75611	2.34715	2.83282	2.45956	2.23951	2.62307	3.99025	2.9377	3.39841
2.97655	2.32567	5.26068	2.90721	2.13101	1.35767	3.92233	3.09184	2.10896	2.15436
6.95362	1.86003	4.50392	10.2015	2.10529	0.821699	3.09589	2.29449	1.17655	1.44068
1.96197	2.20244	5.1566	4.3937	4.00611	1.38268	3.32592	1.85874	2.38633	5.33142
5.04022	12.2018	2.63014	3.19863	2.87956	1.48433	2.34468	3.11792	12.585	2.22904
3.23268	3.88625	2.98247	9.72984	2.09348	1.56458	2.37466	3.46033	1.52203	5.75342
4.99816	2.83359	2.44992	2.42003	2.96918	1.67205	1.98268	4.95342	4.95868	8.04055
3.44836	5.26868	4.42504	5.65567	2.43082	0.891151	2.6303	3.04323	4.44729	1.86463
6.39649	4.54652	3.56047	5.58877	2.56608	1.20945	2.36422	3.12178	4.96101	7.47414
4.6906	6.37764	4.38027	3.9429	3.08137	1.19208	4.6186	2.13748	4.78192	2.84512
6.38258	2.95978	2.28586	2.84833	4.18811	1.75795	2.32038	3.72852	4.50784	2.41712
4.48238	2.80767	2.57614	2.83208	2.55386	1.26027	2.39808	5.1829	5.47647	2.55036
23.0724	2.25014	5.60762	13.5423	1.7177	1.37808	3.2717	2.4931	6.08304	4.31137
2.6083	2.90674	4.61288	4.17912	3.15723	1.41422	1.84556	4.20885	3.64386	1.39373
3.93373	7.81285	3.39658	2.43937	1.80167	1.13301	1.38307	5.03521	3.67381	3.3014
2.79956	6.51323	8.44556	3.14792	8.76907	1.16219	1.87707	2.17414	1.97638	2.12197
5.12386	8.7454	5.46986	3.13688	4.61737	2.57345	3.42041	5.21381	4.27066	3.20482
5.16063	2.36334	5.79962	2.15348	2.54827	1.50559	1.47997	4.15877	2.424	1.90707
6.05079	4.00022	6.08211	4.24112	2.30005	1.45608	1.67858	3.81058	18.0499	6.18329
3.93236	8.18526	11.1699	5.91737	3.2663	2.06553	2.54079	4.89266	6.32556	3.96682
4.63205	3.1297	2.76041	8.28249	2.82532	1.4917	2.67411	2.26666	2.60381	4.20173
2.36932	2.96822	7.29951	3.50159	2.29992	3.29477	2.75578	2.7554	4.27726	2.45101
4.37592	8.08425	3.16145	6.03841	2.68214	1.63436	2.494	1.88693	6.17696	3.00978
2.59825	5.734	6.05718	2.16956	2.25488	1.85093	4.0434	3.78249	2.30515	3.28293
4.18619	4.75636	4.55723	4.47268	2.85597	1.82759	1.98208	2.914	4.3349	1.96274
2.68444	24.0875	3.39293	3.55321	4.93189	2.19737	3.08027	5.61444	2.9366	2.62534
5.00611	5.42482	3.8526	7.26112	4.87337	1.97058	2.608	5.48027	2.24367	1.8351
3.45293	2.79285	4.03447	5.06726	2.9294	2.1069	2.48658	2.55255	4.41929	5.06715
7.82929	3.09074	2.30814	7.95249	2.96142	2.20016	4.37058	1.41279	5.91827	3.63027
6.73068	2.87381	2.56942	5.5526	2.262	1.88145	3.34723	2.34079	1.54071	9.58266
2.93258	18.8802	1.56838	5.14293	4.85682	2.68493	1.39649	2.75145	3.73551	1.64784
5.80567	27.8862	2.55658	4.83932	2.16414	3.13989	3.47523	2.67041	1.44195	8.96334
3.52822	5.61088	3.49871	2.80644	2.32537	1.14299	2.30132	2.96414	8.29638	2.42638
7.98392	20.2229	3.30981	4.68611	5.73296	1.31526	2.84381	3.00279	1.74386	3.37299
6.04732	4.13734	3.46367	4.95932	2.60359	1.43011	2.43553	1.7126	3.82934	5.234
4.23899	2.66518	3.62838	2.46575	6.63203	1.89041	2.62888	2.97466	11.379	4.69567
2.37721	5.50375	10.3335	7.36052	2.51762	4.07734	2.18745	2.49315	9.44148	5.98803
2.7583	8.40233	6.43203	4.72115	8.30778	1.98951	1.87863	5.21907	3.04132	1.89732
2.71159	9.70112	3.38767	3.43173	1.91337	1.92641	3.18622	4.7134	3.12734	2.0094
4.23392	7.84052	3.83814	2.93225	3.31499	1.1209	1.52611	3.80301	1.49573	4.63375
3.57277	10.0455	3.97581	2.39822	4.35148	1.98	1.74696	3.28559	4.32603	1.87134
9.94608	6.23066	5.3637	2.84808	6.38847	1.54203	2.45885	3.65129	2.98556	4.46375
9.25964	2.25751	3.05085	4.3546	2.22474	1.64668	4.14863	2.71164	2.55581	2.80699
2.88819	3.19712	3.62288	3.49597	3.51008	2.10877	2.14759	7.33586	5.46759	2.21304
4.29975	8.00633	4.20493	2.9197	2.06403	2.88652	3.39836	2.0069	2.40129	8.32627
3.68847	13.136	3.64959	3.02441	2.60786	2.23375	5.59416	2.91655	2.55581	6.06929
3.68584	2.58323	3.56055	6.72485	3.84479	0.872658	2.81293	3.56759	1.61074	5.01504
2.88112	5.45616	2.83005	4.04444	3.01159	2.70578	5.60252	3.29156	7.60389	4.23742
3.90214	5.89986	5.10564	4.86962	3.50504	1.14608	3.44438	3.18912	3.22041	2.95995
3.97452	2.93151	7.87748	5.43874	3.42819	1.67819	3.25151	6.33244	7.9677	4.23742
4.08764	2.39978	6.09471	3.69671	2.28395	1.69863	2.82518	1.95178	4.52699	4.73515
2.75679	3.69419	3.70477	3.34912	3.76225	2.61564	4.04441	3.83449	4.33345	3.03542
4.0894	3.45353	2.89586	2.9734	2.51764	1.47142	2.11164	2.12825	2.60219	2.59189
3.01803	4.19175	3.68951	2.55162	1.9986	1.43164	2.48767	6.87948	0.998795	2.29134
4.92137	4.47918	3.2489	3.37726	2.7566	1.50047	3.48551	2.57534	3.18734	3.33351
2.41773	5.34348	11.6655	3.09874	2.43227	2.32249	2.57438	2.81638	2.87551	2.31074
4.54504	4.96701	4.54564	2.05381	2.07773	1.80411	2.89647	4.06364	3.30038	5.15436
4.4709	3.09184	2.58195	2.98742	2.97463	1.34775	2.3051	3.87107	1.26934	3.23526
4.01216	5.04058	2.91353	2.54362	2.03167	3.41964	3.26036	3.86307	2.20362	2.30359
3.87932	2.87953	5.47627	4.58726	2.02466	0.850164	2.95403	2.95214	3.31345	2.61282
3.02362	2.62099	8.78718	2.40751	1.726	4.42479	3.49671	4.78904	2.67885	3.02808
2.63592	8.95088	3.88967	4.58647	2.20474	1.64748	2.05123	5.49052	5.0014	10.8291
2.49271	3.19537	4.80877	4.7211	3.17096	1.93312	4.45014	1.80233	3.92145	10.1376
2.73134	10.7928	3.63071	2.19373	4.86551	4.76548	2.36542	1.99458	2.4214	1.76986
2.10967	2.13488	4.20175	1.62896	3.36855	1.19559	5.16145	5.38822	2.4086	4.33052
4.98156	4.24263	2.78353	8.38175	4.06384	1.22085	2.69258	2.03134	2.30348	9.2246
3.50063	1.77564	4.45523	3.46671	4.10882	0.931178	3.44515	2.02934	6.21156	7.54112
3.86674	5.84101	3.86186	7.63184	2.12742	1.97386	3.32274	1.91016	3.19038	5.46866
3.07652	5.02921	4.22559	2.62044	2.57534	1.67704	2.00123	3.22638	4.13326	6.08277
5.78707	1.83556	1.84792	5.45003	2.35616	1.39485	6.70537	4.33307	13.585	2.49975
7.08888	6.14795	2.62019	1.9977	8.42888	1.86014	4.28175	2.04811	1.13597	5.06534
2.73822	8.82427	11.9455	2.7797	5.37529	1.30049	2.34995	2.31855	4.73981	4.43173
2.86496	5.30501	8.07192	2.0711	3.53334	1.14767	3.80822	6.42849	4.89019	4.22055
4.02156	2.90088	16.1073	3.2443	1.89438	2.85942	2.66332	4.47986	6.17441	10.2895
1.71647	6.38184	11.7279	2.56477	3.2663	2.17559	5.04986	2.92288	4.60888	8.38978
4.21877	4.05027	4.71811	1.89912	4.07175	2.11422	4.47195	2.99822	2.60885	2.22704
6.45677	6.54052	4.07132	2.90079	4.06778	1.67422	2.05989	12.0227	1.06677	5.47151
5.0411	6.49899	9.37422	4.83907	2.25641	3.76151	3.24619	2.44934	1.68773	1.84521
4.65934	5.75773	7.17104	16.452	1.80096	2.90195	2.32099	2.08967	7.29173	7.17082
6.06729	3.50655	3.20573	4.40655	4.05142	2.45512	9.15658	3.41814	2.67208	4.73419
2.66332	3.66066	3.06551	3.13301	3.89263	2.88742	2.75647	3.95156	2.72014	8.07025
2.49252	2.38153	2.68797	5.43748	4.16762	4.06781	2.70405	3.99773	2.68537	4.20197
3.41682	4.76392	3.84726	4.04277	1.77458	3.71384	6.34195	12.1971	1.76781	4.65707
3.15008	6.7729	11.0536	3.48811	1.83479	1.92989	4.28247	7.73425	2.6966	3.52173
3.81871	4.00027	5.86238	2.98293	3.35718	2.42282	2.41912	5.33542	11.3506	3.65093
3.81844	4.05279	5.66932	4.39118	4.14978	1.92893	3.08803	5.29715	10.4873	2.66219
7.58255	1.80258	8.32268	2.35729	9.26282	1.72463	2.02992	3.42088	3.6389	1.56822
2.3454	4.68868	2.84173	1.40342	4.44036	2.02474	3.24619	2.286	6.88334	2.13904
3.81871	3.13463	7.61666	2.18663	3.94392	1.71729	9.47356	2.26132	10.7709	7.27934
4.24203	4.19337	4.93063	2.12537	2.83395	2.25	4.21197	2.5949	2.286	1.22518
4.17247	8.47334	4.58173	3.33742	3.67022	1.26299	3.93921	8.13753	6.26145	2.77789
2.53548	7.37	14.4809	3.34764	3.35411	2.42597	3.75312	3.26997	6.05058	3.14288
3.94841	2.93532	7.32123	2.86507	3.22682	2.27767	4.44052	6.34096	2.99071	6.07019
4.50074	2.44274	3.23342	2.13312	2.76156	1.46989	2.70658	3.64912	1.70677	1.92748
3.58586	14.6174	3.57674	3.76778	4.01532	1.28885	2.35164	8.97896	3.26627	8.22633
3.54214	4.74726	2.20356	1.74685	2.93499	2.94742	3.26027	2.54249	2.78255	1.96816
3.34266	11.1666	2.66222	6.70301	2.32359	1.95493	4.75337	4.60159	2.02164	1.92934

## Sheet: L-W ratio
Pinus yunnanensis	Cryptomeria japonica	Pinus massoniana	Pinus densata	Quercus glauca	Stipa capillata	Miscanthus sinensis	Neyraudia reynaudiana	Arundinella setosa	Cyperus cuspidatus
Evergreen coniferous forests				Evergreen broad-leaf forests	Grasslands	Herbs
1.42884	1.63647	1.46882	1.31507	1.32501	1.36635	1.17189	1.92638	1.62556	3.74777
1.35622	1.86928	1.5046	1.57749	1.21833	2.18583	1.03457	1.52609	1.16812	1.195
1.43651	1.51616	1.10663	2.49811	1.23103	2.68605	1.05728	2.85735	1.85254	2.51356
1.81332	1.74113	2.07978	2.0074	1.15958	1.56459	1.26866	2.03613	1.43178	2.18338
3.6659	1.40357	1.12238	1.06128	1.56396	1.41455	1.59136	1.53601	2.84724	2.12272
1.54903	1.72149	1.55999	1.36379	3.4399	1.92357	1.21889	1.71943	2.21298	2.38651
1.33779	2.41163	1.98164	1.52948	2.97659	1.54803	1.81229	3.06872	4.76867	1.04958
2.07748	1.83709	1.0742	1.03997	2.45192	1.4	1.1282	3.06872	1.33464	2.4519
1.34766	2.03548	1.49529	1.89307	1.03394	1.13052	1.13961	1.15517	2.27995	2.15957
1.3086	1.23282	1.65689	1.52768	1.31825	1.68571	1.24695	2.18691	2.39557	1.81553
2.90658	1.09894	1.24097	1.52206	1.3094	2.51323	1.52615	1.35556	1.84457	1.57239
1.17019	1.57292	1.7028	1.22122	1.0498	1.13663	1.28784	1.29764	1.64984	1.23589
2.22412	2.08101	1.20105	1.06083	3.42477	1.47538	1.69228	1.32572	3.92185	1.57897
1.69816	2.23928	1.51212	1.78102	1.37321	1.14886	1.20961	2.30029	1.14028	2.03819
1.46871	1.29902	1.23825	2.57005	1.10676	1.61921	1.39149	4.20675	1.94665	2.83344
1.42179	2.87901	1.41817	1.01262	1.20196	1.54319	1.25714	2.02547	1.26451	1.71011
2.40074	1.11476	1.46896	1.17068	1.82483	1.30158	1.57614	1.08858	2.13814	1.48029
2.84155	1.55986	2.39265	1.25001	3.48846	1.55705	1.57641	1.61203	1.67491	1.63322
1.82084	1.75839	2.56898	1.41485	1.94719	5.02519	1.03016	2.0229	2.22736	1.19261
2.68146	1.26233	4.83719	1.55996	1.32369	1.03976	1.34835	1.1234	2.54176	2.17059
1.85738	1.13523	2.54264	2.04284	2.29638	1.62477	1.38204	1.88245	1.46022	1.2694
2.13575	1.42372	1.99866	2.59132	1.54686	1.53015	2.46488	3.58628	1.0444	1.12769
2.66492	2.21653	1.76535	1.37887	1.52784	2.65876	2.05661	1.31375	1.08664	1.11838
1.88351	1.71059	1.22588	4.48298	2.13926	1.01172	2.54166	3.29391	1.38666	1.22951
1.34754	1.33352	1.06435	1.00047	1.56596	1.08226	3.11063	1.39571	1.04718	1.38976
1.38977	1.61397	1.22907	3.84446	1.42941	1.9679	1.63667	2.40845	1.60331	2.32755
2.31016	1.03585	1.21209	1.06203	1.2555	1.18603	1.02721	1.86473	1.21343	1.05577
1.72365	1.1335	1.50984	1.14151	2.0204	2.99191	1.30811	2.4519	1.89423	3.71023
1.56518	4.97762	1.70173	1.38163	1.77208	1.56031	2.0408	1.25879	1.84872	1.75684
1.86595	1.25533	4.10454	1.67743	1.13667	1.73778	1.2	2.47	2.40842	1.79676
2.43609	2.04898	1.72626	1.29988	1.13782	1.16904	1.42658	1.71138	1.60152	1.49319
2.48492	1.55828	1.44512	1.83137	1.02166	1.74127	2.11723	2.30623	2.30736	1.01883
1.38587	1.42856	1.02811	1.10149	1.51347	2.52362	1.93447	1.36165	4.67403	3.28974
1.14514	1.37613	1.81564	2.74037	1.82651	2.6459	2.56177	1.45527	2.40004	1.36162
2.36559	1.22095	2.58265	1.34046	1.03248	1.35668	1.48782	1.43117	1.05046	1.32825
1.41725	1.98152	1.41094	1.59985	1.48799	1.67388	1.02295	1.58387	1.39404	1.85099
3.15816	2.79207	1.27918	2.44663	1.77576	2.40034	1.16316	1.9142	1.52549	2.29012
1.07071	1.52663	1.95383	1.47343	3.22287	2.42857	1.31055	1.93892	1.55535	1.01262
1.40007	1.91278	2.55663	1.27662	1.30581	2.14035	1.3848	1.73473	2.02505	2.13362
1.10914	2.73976	3.61244	1.73597	1.711	1.36674	2.18462	3.67018	1.60403	3.80357
1.05263	1.39872	2.33567	1.46152	2.08999	1.48281	1.10204	2.18554	3.28901	3.59025
1.13211	1.28293	1.7689	1.60581	1.66388	1.47368	1.29508	4.04372	1.92909	1.63992
1.63753	3.69058	1.55068	1.18351	1.40322	2.16839	1.84905	4.36808	2.61306	1.31034
1.08724	1.95996	1.45438	1.46024	2.49089	2.3364	1.646	2.73857	2.76722	1.49779
2.98377	1.34164	1.15634	1.00534	2.0385	1.43854	1.16375	1.78856	1.78787	1.48534
1.07975	1.8422	1.30892	1.83113	1.23077	2.14039	2.60061	1.64296	3.05824	2.14696
1.64329	1.10841	1.89145	1.20722	2.18739	1.11122	2.94822	4.29461	1.92322	1.77855
1.62587	1.28368	1.04537	1.51132	1.96474	1.09109	1.01104	1.38888	1.56711	2.82569
1.35191	2.79546	1.13496	1.90967	1.52424	1.35851	1.23427	2.00113	1.93641	1.2469
1.62551	1.56839	1.58025	1.10853	2.52864	1.43741	1.52799	3.62947	1.18746	1.62427
1.3983	1.38807	1.1191	1.55683	1.15721	1.18697	1.16981	1.34712	3.73586	1.24782
1.07931	2.74918	1.50096	2.18806	1.9917	1.77049	1.40494	1.60043	1.00759	2.14167
3.39452	1.0764	1.12775	1.7249	1.53348	1.5147	1.59999	1.6167	1.38158	2.25945
2.36115	1.58867	1.29684	1.04806	2.7012	1.58236	1.73606	2.31067	3.82003	1.575
2.11789	1.07184	1.58794	1.338	1.28325	1.0071	1.7083	4.8559	1.70604	4.15185
1.23518	1.50729	1.01624	1.10417	1.07507	1.73701	1.09937	1.78489	1.24044	2.24967
1.6143	1.70362	1.70037	1.16755	1.39507	1.70563	1.51563	2.14099	1.10236	2.21485
3.15968	2.63225	1.87538	1.44397	1.2673	2.19208	1.51179	3.75022	1.29743	1.94058
1.52438	1.71605	1.45099	2.8393	1.58207	1.56139	2.07137	2.52374	1.12019	1.14433
2.1765	2.19811	1.06903	2.20427	1.72025	1.37232	2.07206	2.56262	1.43015	1.12986
1.98498	1.14762	1.35975	1.12535	2.53912	1.30789	1.10183	2.4103	1.14966	1.15487
1.12793	1.29767	1.21245	1.19606	1.2923	3.20335	1.00465	2.43154	1.32037	1.27886
2.16901	1.70941	1.42627	1.31461	1.70425	1.02385	1.59537	2.88796	1.72113	1.71438
1.80328	1.87441	1.20354	1.50824	1.11207	1.05887	1.99849	2.28935	3.71416	2.52865
1.45785	2.03329	2.11785	1.42139	2.15278	1.44542	1.0172	1.50058	1.01923	1.78866
1.1089	1.30796	2.86971	1.21614	1.27977	1.43995	2.39738	1.01652	1.8199	1.39791
1.2203	1.13028	1.41708	2.06723	1.64476	3.52183	1.84292	2.68272	1.42741	1.05718
1.01676	1.7682	2.25516	1.39602	1.43212	1.53469	1.40592	1.71837	1.47049	2.52447
1.31624	1.83028	1.19493	1.11556	2.89522	1.50355	1.54721	1.12833	1.61786	1.72094
1.74436	1.11618	2.1384	2.95886	3.42635	3.29157	1.24056	1.24802	1.64813	1.28563
1.10445	1.23861	2.24608	1.62021	1.97283	1.63002	1.0841	1.29547	4.18184	1.71335
1.49715	1.95438	1.1888	3.32429	1.84645	1.79627	1.12032	3.33143	1.11026	1.50596
1.31899	1.76923	1.7212	2.36563	1.42152	2.54274	1.67994	4.07593	1.05636	1.15415
1.34921	1.39187	1.89214	1.76347	1.11675	2.00705	1.28713	1.67939	1.71373	1.04358
1.33718	1.97596	1.48199	1.39573	1.72471	1.59007	1.55364	3.58114	1.86851	1.3409
2.72292	2.17386	1.99621	1.95715	1.05069	1.36266	1.29536	3.81485	1.38198	1.23988
2.72923	1.8965	1.46897	2.49899	1.59619	1.17337	1.44048	2.54443	1.27518	1.7022
2.00944	1.32594	1.02691	1.07321	1.30007	1.5737	1.35799	1.88606	1.09382	1.69442
2.98957	1.83456	1.6788	1.55537	1.61237	1.13461	1.11102	5.02701	1.6525	1.5321
1.71347	1.61966	1.43703	1.44967	1.38682	1.22986	1.86875	1.79538	4.53656	1.35951
1.2492	1.67483	2.74043	1.27799	1.26466	1.2891	1.41561	4.71712	1.29399	1.7413
1.15732	1.47395	1.67264	1.0782	2.27941	1.78788	1.64995	2.87405	2.22406	1.04251
4.45212	1.61966	1.31278	1.6478	1.20636	1.74751	1.86747	2.51611	1.06541	5.28705
1.57845	1.07937	2.56029	1.34841	1.6506	1.01751	1.72275	3.26212	2.06579	3.58035
1.96481	1.78551	2.77242	1.0676	1.42775	1.57735	2.26723	2.11111	1.30228	2.33719
1.54895	2.73781	1.15836	1.43616	1.19917	1.00093	1.44067	1.83218	4.19602	2.69375
1.32374	3.88502	3.72496	1.27819	1.20652	1.49321	1.33142	2.29072	1.13257	1.87314
1.67856	2.03582	3.40932	1.64319	1.02681	2.12071	1.38434	4.47343	1.88103	3.27719
1.81203	1.78807	1.95805	2.2178	4.04574	2.59621	1.08958	3.43814	1.64309	3.27719
1.36851	1.39625	1.83537	1.62011	1.04659	1.94761	1.08079	5.07931	1.06545	1.37162
1.2731	2.05385	1.73784	1.1565	1.24514	1.34691	1.5523	3.14284	2.78779	1.07805
1.91154	2.46525	1.40637	2.25273	2.01055	1.20012	2.35256	3.54631	1.35141	1.4877
1.73888	1.60072	1.02885	4.63097	1.72085	1.49782	2.00293	1.46822	2.04676	2.43297
1.11497	1.01533	1.98227	4.16062	2.24229	1.22105	2.33887	1.13938	1.36403	1.86106
1.06789	1.23128	1.4044	1.16208	1.35232	2.13916	1.54446	1.47197	1.35636	1.80287
1.95126	1.45112	2.06638	1.55693	1.49067	1.13846	1.11532	1.71215	1.22443	1.43067
2.25981	1.28142	2.20487	1.13196	1.20585	1.23303	2.1251	2.13853	1.06545	1.36645
1.87644	1.68293	3.68646	1.2383	1.52656	1.81818	1.61115	2.84971	1.43084	1.85229
2.32072	1.48853	1.3577	1.00149	3.55065	1.34812	1.39714	3.24751	1.39868	1.09352
1.00631	1.12181	1.97512	4.05771	2.61459	4.23666	1.22364	3.33406	2.26842	1.19118
1.45757	1.14563	2.21138	2.40537	2.21236	2.06553	2.7864	3.50764	2.84883	1.5788
1.66681	2.1852	1.6936	1.49696	1.21258	2.87219	1.56848	3.23673	1.52706	3.24657
1.80623	1.18785	1.19324	1.3319	2.04054	1.03944	1.68229	1.59142	1.81933	1.93687
1.12482	1.3106	1.32985	1.43044	2.4961	1.18457	1.18678	1.725	2.01535	1.20054
1.17025	1.75409	2.46442	2.1288	1.55532	2.26358	1.25252	1.14862	1.11573	1.56313
2.63901	1.39867	1.39434	1.65043	1.0438	1.2374	2.35928	1.05913	2.7627	1.86888
1.09492	1.72543	1.77249	1.9414	1.21005	1.77924	1.59154	1.11503	1.77673	2.82568
1.92519	2.42431	1.16869	1.08036	1.61983	1.80708	2.35271	1.54787	1.73739	1.23734
1.01987	1.84874	2.11601	1.51564	1.28679	2.08647	2.10313	1.10533	1.09371	2.73717
2.03264	1.22627	1.06473	3.44106	2.12986	2.15602	1.00468	2.88203	2.56901	1.95002
1.43257	1.09901	4.22852	2.30601	1.52853	1.43387	1.8763	1.0421	2.42656	1.59981
1.87337	2.08455	1.58451	1.52799	1.75566	1.44915	3.23621	1.53057	1.08749	2.4515
1.64497	1.60679	2.09821	1.35085	5.5207	1.03016	1.01955	1.02378	1.86483	1.33885
1.01075	2.24428	1.04985	4.40081	3.06117	1.21675	1.6605	2.72133	1.83985	1.25329
1.7154	1.30039	1.14068	1.10195	1.52541	1.07586	2.01779	2.51492	1.2149	1.50996
2.51708	1.04725	1.12172	1.07056	3.21645	1.13278	1.13442	2.33168	4.55754	1.30237
1.55008	2.26809	2.0474	1.19472	2.41722	3.15607	1.58768	1.80649	1.05876	1.43302
2.30523	2.02475	1.1945	1.53628	1.15309	1.44915	1.92473	1.20831	3.70292	2.09163
1.05476	1.65642	1.24531	1.74019	1.56101	1.62244	1.356	2.21076	1.10337	1.16435
2.03252	1.81496	1.0371	1.69665	1.53102	1.13397	1.33794	2.47929	1.25126	1.5097
2.40877	1.28061	1.17038	1.24513	1.00673	1.73845	1.63846	4.25599	1.5167	1.11717
2.39606	1.09284	1.94913	3.51488	1.13305	2.90998	2.23377	3.43684	2.83194	1.15127
1.85645	1.25198	3.61311	1.66672	1.44813	1.51184	1.20572	1.4724	1.47336	1.62832
1.69548	1.52686	2.31229	1.19056	1.31637	1.68803	1.56133	1.50974	1.64368	1.43222
1.14917	1.72101	2.31229	1.32289	3.21753	1.34136	1.10589	1.39026	1.98684	1.29034
1.72463	1.1796	1.17872	1.61879	1.55978	1.5845	1.20859	1.3901	1.23743	2.50851
2.01117	2.7081	1.41158	3.33839	1.39864	1.29875	1.28958	3.34192	1.2349	2.0501
1.00238	1.28859	1.10088	1.41246	1.64762	1.92659	1.29344	1.03495	1.29813	2.32516
1.09024	1.06387	1.06943	1.63546	1.58744	1.6592	1.45618	2.10624	1.19458	1.48575
3.44751	2.24077	1.61518	1.19831	1.74393	1.10169	1.16008	1.41018	1.55548	1.35958
1.45972	1.43405	1.40809	1.85852	1.57589	1.26389	1.30137	1.41111	2.80385	1.28489
4.08391	2.31696	1.38962	3.76323	2.40026	1.09384	1.94538	2.50608	1.63299	2.7046
1.21946	2.20266	1.51037	1.74893	1.11226	1.13509	1.05366	3.55218	1.58015	2.71065
2.99161	1.62221	1.52986	1.00149	1.52082	1.11278	1.66413	1.80467	1.57536	1.73083
1.25495	1.55206	1.08431	2.15528	1.15851	1.08601	2.85033	1.26034	1.11008	1.83338
2.0998	2.18723	1.91323	1.15483	1.76044	1.36077	2.18215	2.30756	2.00772	1.44796
4.50939	2.24121	1.12094	1.2862	3.13434	2.27616	1.07081	1.71181	3.2924	1.06888
1.31214	1.20852	1.95124	1.29965	1.21329	1.75978	1.36073	1.6661	3.91582	2.38466
1.51705	3.30879	1.75468	1.53608	1.06638	1.28061	3.22637	1.84148	2.02221	1.32581
2.3421	3.01168	2.06135	5.62483	1.63017	1.03556	1.55987	2.1769	1.13023	1.74887
1.48506	2.56823	2.37317	1.07934	1.26872	1.3637	1.55016	1.34423	1.08775	1.00866
2.22613	2.42467	2.52304	2.5697	2.78641	1.88397	1.06316	3.91336	1.52234	1.63574
2.35493	1.23901	1.49533	1.62846	2.34926	1.10384	1.51733	1.1686	1.50309	1.69948
3.07941	1.72202	1.25603	1.53369	1.0305	1.55919	1.41548	1.63998	1.43768	1.62239
1.57802	2.56688	1.94572	2.66092	1.1549	1.47217	1.67892	3.23406	1.01306	2.0545
2.66672	2.20156	1.53991	1.78195	1.8307	1.37845	1.3592	2.68155	2.10313	1.07532
1.17698	1.72153	1.10965	2.03921	1.46208	2.7293	1.68357	5.11949	3.54623	2.0923
2.37528	3.2311	1.21974	1.89113	1.30938	1.01065	1.20802	2.26641	1.96965	1.38472
3.90904	2.24869	2.38256	1.43382	1.19482	1.09585	1.42789	1.60988	1.69678	2.45378
2.54648	2.46624	1.43102	1.15728	1.27804	1.14365	1.23412	2.40258	1.27828	2.24385
1.03214	1.55162	1.1277	1.60598	1.24026	1.16655	2.50911	2.88289	4.46768	2.17585
2.32675	1.29517	1.44078	1.72064	1.43175	2.00677	1.20341	1.80288	1.81025	1.40253
2.72345	1.96298	1.03819	2.16471	1.14003	1.34712	1.33915	3.17865	1.42759	2.53911
2.19898	1.06462	1.81962	1.54614	1.55311	1.22145	1.258	2.05351	1.38872	1.78469
1.92242	1.6143	1.11798	1.44469	1.83636	1.67242	1.5863	1.32622	1.38479	1.93821
1.14713	2.1688	2.50884	1.08025	2.13581	3.04688	1.54867	2.66961	5.81236	3.23347
3.66958	1.45336	1.25	1.28043	1.06396	2.71776	1.30695	2.32796	3.83603	2.35408
1.24519	2.18788	1	2.18566	1.40635	2.2858	1.4849	1.96011	1.98825	1.34612
4.25974	1.51111	1.84462	1.29544	1.60663	2.18859	1.45052	1.01218	3.23923	1.59553
1.8516	1.57651	2.33413	1.62914	2.32113	3.63429	1.17896	1.24004	1.57766	1.08663
1.65731	1.28353	1.17592	2.1732	1.48532	2.54346	1.04947	1.56194	1.2516	2.95004
2.14353	1.42132	2.00855	1.46212	2.30863	1.32676	1.1953	1.98618	1.48794	1.10616
1.35208	1.66136	1.88091	1.06527	1.29482	2.14298	1.47734	1.87421	2.45168	2.37735
1.45731	1.1365	1.73305	1.36056	1.52424	1.88329	2.10506	2.10758	3.92857	1.07354
2.50217	1.55775	1.35116	1.07859	1.88803	1.36957	1.7279	1.93474	1.02865	1.74466
1.37046	1.53123	1.35974	1.43727	2.25646	1.04817	1.10488	2.17521	2.05828	1.3683
2.93644	1.97888	6.19415	1.34045	1.22299	1.52054	1.55041	1.44175	1.81775	1.87223
1.59559	3.8448	1.27293	1.64097	1.73118	1.92054	1.94596	1.73319	1.9886	1.57161
1.25102	2.06041	1.06845	2.22356	1.62248	1.95985	2.67232	3.88226	1.75339	1.73074
1.23514	1.21646	1.08856	2.24684	1.76727	1.18108	1.36643	1.07556	1.53523	2.08173
2.20929	1.06783	2.32783	4.16062	1.85321	3.25137	1.84752	3.70969	2.2079	2.34283
1.29167	1.30604	1.53635	1.61491	1.23117	1.09743	1.51825	1.87049	1.17819	1.83355
1.19895	1.6701	1.32074	1.16105	1.4152	2.7391	1.51382	1.74619	1.64955	1.80441
2.14356	1.04247	1.35456	1.16174	1.51891	1.66235	1.03239	3.01644	2.04872	2.75447
2.28803	2.62947	1.12963	1.56895	1.4204	1.28513	1.29122	2.04231	1.9841	1.92517
1.7216	1.7526	1.61807	1.17434	1.2384	1.95507	2.22463	2.77776	1.47894	1.39104
2.05002	2.04075	1.32807	2.02087	1.43908	2.64542	1.22471	1.68237	2.07527	1.35515
2.91105	1.75128	1.58306	2.73269	1.89154	1.69925	1.69286	2.54543	1.54119	1.555
3.29529	1.36233	1.36905	1.15172	2.08142	2.06892	1.30817	2.06576	1.75379	1.68074
2.6025	1.524	1.49116	2.58193	1.05283	1.22301	1.08817	1.36803	1.59378	3.70436
1.96836	1.65705	1.86445	1.33514	1.41236	1.04677	1.34828	2.63572	1.04862	1.60116
1.22379	1.44267	1.84588	1.29967	1.56216	2.04373	1.48241	4.28117	1.30657	2.49631
1.99355	1.63224	1.26752	2.40244	1.83019	1.1411	1.17462	2.54339	3.29044	2.01458
1.29187	1.80442	2.90705	1.98053	1.04461	1.18367	2.73923	1.94015	1.60183	1.48327
1.69598	1.03165	1.29	1.3424	1.26688	1.09325	1.03567	1.48888	1.82254	1.03184
2.25981	2.04774	1.27318	1.63375	1.05066	1.66102	1.06939	2.46273	1.39355	7.41131
1.72581	2.02677	1.1852	1.17604	1.38307	1.54069	1.15158	1.10967	2.19359	1.57429
1.63753	1.46969	1.38141	1.64663	1.76512	1.64821	1.18137	2.31729	1.14228	2.35678
2.00597	1.28572	1.17748	1.8	1.21871	1.23188	2.04879	2.19166	1.45928	1.0949
2.50103	1.05464	1.4095	1.05013	1.74143	1.07247	1.82123	2.32967	1.96043	1.52913
2.60318	1.13396	1.01761	1.21412	1.35707	1.85709	1.60573	2.02497	2.91811	4.16915
1.96506	1.65082	2.05878	1.28903	1.11724	1.14147	1.90494	1.83618	1.48781	1.32317
1.91723	1.37655	2.36186	1.74961	1.24857	4.48698	2.51866	1.28809	3.97071	1.59477
1.61308	1.65695	1.19708	1.99719	2.25183	1.08858	1.44266	1.75812	1.56263	1.71258
1.8178	1.21387	2.74531	1.37672	1.40937	2.0204	1.50545	1.3646	1.34906	1.5615
1.95924	3.84067	2.15261	1.00138	2.31196	1.04707	1.1991	1.93049	3.6712	1.38801
1.23639	1.08225	2.04128	1.29205	1.71737	1.26931	1.94329	1.35921	1.29083	2.72399
3.15248	1.47262	1.6018	1.64391	1.548	1.65176	1.03185	3.71377	3.90748	1.09682
3.91341	1.41945	1.0197	1.65378	2.12453	1.66754	1.89904	3.54453	3.6712	1.29112
1.54491	2.22617	1.94368	1.01282	1.21655	1.99268	1.35812	2.11064	2.82702	2.55255
1.41716	2.13448	1.60462	1.67284	1.24212	1.86431	1.00328	1.29141	1.12476	1.58439
1.24642	1.0277	5.9826	1.62228	1.47174	1.70874	1.25619	1.43465	2.32518	1.98339
4.58845	1.25234	1.41551	1.26177	1.81689	2.18191	1.09815	1.19312	1.01865	1.58439
1.26452	1.59496	2.60851	1.02414	2.16405	1.14516	1.61574	1.87059	1.14819	1.19378
1.61778	2.76435	2.39726	1.19769	1.23157	1.46415	1.29463	3.14949	1.81122	1.29024
1.98868	1.00984	2.03946	1.10176	2.00492	1.45266	1.8165	2.42408	1.77478	1.14009
1.54996	2.0979	3.06835	1.67968	2.88315	1.44522	1.94191	1.05914	4.77027	2.03776
2.33477	1.91563	1.38948	1.31957	1.72477	1.74806	1.00706	1.01064	4.92828	2.28395
4.70269	1.20043	1.05201	1.30623	1.53739	1.71024	1.88493	2.04584	1.03538	2.43609
1.32749	1.17355	1.71698	2.9489	1.97187	2.01415	1.4907	1.43691	1.01755	2.38421
2.56301	1.00512	4.69188	1.04246	1.61938	3.59094	1.23098	1.60901	2.02366	2.21073
2.73607	3.53451	1.87983	1.4729	1.84595	1.00266	1.36909	2.06832	1.60689	4.04732
2.57945	1.25197	1.68042	1.72027	3.77434	3.56943	1.06069	2.08943	1.41796	2.77167
1.44486	1.05992	1.18427	1.60322	1.6593	1.50343	2.10389	1.11772	1.13363	2.0788
2.46578	3.35492	1.59506	1.34599	1.04608	1.63388	1.22229	3.5846	1.46378	1.04142
1.4929	2.00183	1.72465	1.15695	1.2417	1.47664	1.14348	1.67464	1.10711	3.12286
1.45238	1.4199	1.30741	1.19373	1.11233	2.097	1.05017	4.34789	2.16677	1.77709
2.15079	1.72232	2.39125	1.60168	1.07881	1.47102	1.69592	3.24224	2.13035	1.29043
1.64464	1.31051	1.05825	1.30079	1.66943	1.98793	2.13165	2.21961	2.05651	1.8621
1.04231	3.27733	1.89222	1.38615	1.11826	2.43424	1.77092	2.15493	1.7546	1.77338
1.47679	2.76698	2.05192	1.19217	2.1932	1.70086	1.68595	2.39552	2.94329	2.67332
1.06295	1.27882	2.29758	1.25265	1.05319	1.28924	2.15793	1.58396	1.88069	2.41226
1.21621	1.54123	1.55405	1.17008	2.76512	1.58332	1.83842	1.06693	1.32038	1.63785
1.18	1.20949	2.34837	1.51905	1.19095	1.70796	1.06239	1.82615	5.60104	1.85884
2.82687	1.2668	1.29363	2.77722	1.21333	2.27279	1.77376	2.01837	1.14826	1.20664
2.49521	1.29587	1.01667	1.42769	1.32846	1.91905	1.02158	1.89506	1.08877	1.03298
2.22407	1.64071	1.52826	1.9923	1.52746	1.46027	1.00375	1.83992	1.24817	1.54017
2.85438	1.40969	1.06329	2.05518	1.0793	2.3974	1.31644	2.94248	1.20574	2.04255
1.64769	1.68325	1.27353	1.34193	1.28461	2.54089	1.08077	2.44948	2.13225	1.72698
1.466	2.10491	3.15575	2.55236	1.53635	2.62974	1.27097	1.60674	3.17164	1.13224
1.27717	1.92044	1.46357	1.69702	1.91717	1.2671	1.83477	3.53294	1.64964	1.68861
1.25041	1.48	1.94321	1.76399	2.16793	2.29598	1.18914	1.81405	1.08021	2.54042
1.33557	1.27054	1.3878	1.40979	1.80822	1.611	1.00825	1.25931	1.33601	2.65635
2.59152	2.38842	1.79603	1.40169	1.95967	2.17726	1.60499	1.62135	1.43652	1.31158
2.51868	2.0736	2.33569	1.29564	1.21739	1.39156	1.25494	2.43554	3.89539	2.60463
2.33427	1.49164	1.57006	1.7308	1.41029	1.76595	2.58589	1.30287	2.17066	3.54736
1.15059	1.53619	3.31743	1.07832	2.00019	2.30532	1.234	1.17175	1.4691	1.52544
3.20355	1.06627	1.46009	1.35517	1.47847	1.06963	2.06002	5.07554	1.09025	1.56014
2.47008	1.20765	1.14113	1.19454	1.55155	1.60809	1.35759	1.02762	2.03496	1.00884
1.88416	2.60186	1.86738	1.01263	1.1565	1.57372	2.65666	1.52432	2.16153	2.73576
4.90384	2.4708	1.65945	2.15553	1.11631	2.33046	1.83477	1.93219	2.484	1.42291
3.20355	1.20053	1.20782	2.20618	1.00339	1.75664	1.46709	2.8697	2.26524	4.07347
1.90551	1.15159	1.11502	5.78988	1.36216	1.19866	1.074	1.83887	1.70338	3.69183
1.30822	1.62942	2.70402	2.42836	1.0748	3.12462	1.2	2.21626	1.04341	1.91009
3.35685	2.5128	1.0501	1.22565	1.42138	2.91847	1.41729	2.69653	2.11788	1.44157
1.76967	1.0597	1.24334	1.55709	2.25398	4.75649	1.25472	1.19441	4.94094	1.51441
2.31242	1.48734	1.22694	1.79897	1.53406	2.13004	1.33903	1.12848	2.42639	6.2899
2.0163	1.14886	2.59684	1.52837	1.20538	2.43416	1.01381	1.93764	1.55689	2.11604
1.11453	1.13378	2.49286	2.30753	2.29384	1.55897	1.40336	5.44062	1.44598	3.03937
1.2416	1.36651	2.71743	1.18733	1.08124	1.1791	1.37645	4.14594	1.15758	1.40934
